# Supplementary material for: Integrated clustering signature of genomic heterogeneity, stemness and tumor microenvironment predicts glioma prognosis and immunotherapy response
Source: publisher site journal article supplement (doi:10.18632/aging.205018), 2023-09-11
Supplement: Supplementary file [file aging-v15i17-205018-supplementary-material-SD1.pdf]

## SUPPLEMENTARY FIGURE

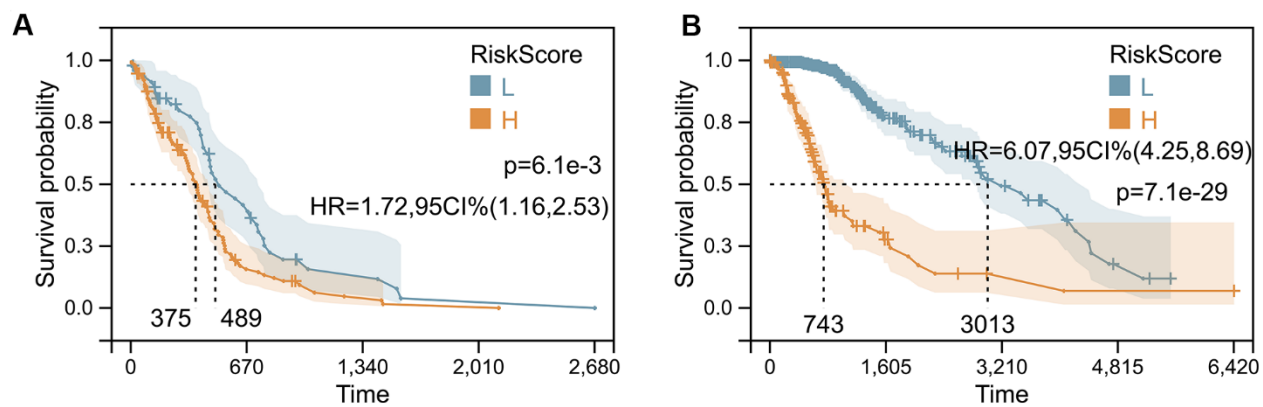

**Supplementary Figure 1. Validation of risk model in GBM and LGG.** (A) Kaplan-Meier curves displaying prognostic differences between high- and low-risk groups in GBM and (B) LGG cohorts, respectively.
