# Supplementary material for: Integrated clustering signature of genomic heterogeneity, stemness and tumor microenvironment predicts glioma prognosis and immunotherapy response
Source: Aging (Albany NY). 2023 Sep 11;15(17):9086–104. doi: 10.18632/aging.205018 (PMC10522363; doi:10.18632/aging.205018)
Supplement: Supplementary Table 1 [file aging-15-205018-s002.xlsx]

## Sheet: aging-23-016279-s002
Supplementary Table 1. Clinical information for the TCGA glioma dataset.
sample	Time	Status	Censor	IDH status	MGMT promoter status	Grade	Group	Age
TCGA-02-0047-01	448	1	Dead	Wildtype	Un-methylated	WHO IV	GBM	79
TCGA-02-0055-01	76	1	Dead	Wildtype	Un-methylated	WHO IV	GBM	62
TCGA-02-2483-01	691	1	Dead	Mutant	Methylated	WHO IV	GBM	44
TCGA-02-2485-01	1561	1	Dead	Wildtype	Un-methylated	WHO IV	GBM	53
TCGA-02-2486-01	618	1	Dead	Wildtype	Un-methylated	WHO IV	GBM	64
TCGA-06-0125-01	1448	1	Dead	Wildtype	Methylated	WHO IV	GBM	64
TCGA-06-0129-01	1024	1	Dead	Mutant	Methylated	WHO IV	GBM	31
TCGA-06-0130-01	394	1	Dead	Wildtype	Un-methylated	WHO IV	GBM	54
TCGA-06-0132-01	771	1	Dead	Wildtype		WHO IV	GBM	50
TCGA-06-0138-01	737	1	Dead	Wildtype		WHO IV	GBM	43
TCGA-06-0141-01	313	1	Dead	Wildtype	Un-methylated	WHO IV	GBM	63
TCGA-06-0152-02	375	1	Dead	Wildtype		WHO IV	GBM	68
TCGA-06-0156-01	178	1	Dead	Mutant		WHO IV	GBM	57
TCGA-06-0157-01	97	1	Dead	Wildtype		WHO IV	GBM	63
TCGA-06-0158-01	329	1	Dead	Wildtype		WHO IV	GBM	74
TCGA-06-0168-01	598	1	Dead	Wildtype		WHO IV	GBM	60
TCGA-06-0171-02	399	1	Dead	Wildtype		WHO IV	GBM	66
TCGA-06-0174-01	98	1	Dead	Wildtype		WHO IV	GBM	54
TCGA-06-0178-01	2681	1	Dead	Mutant		WHO IV	GBM	39
TCGA-06-0184-01	2126	1	Dead	Wildtype		WHO IV	GBM	64
TCGA-06-0187-01	828	1	Dead	Wildtype		WHO IV	GBM	69
TCGA-06-0190-01	317	1	Dead	Wildtype		WHO IV	GBM	63
TCGA-06-0210-01	225	1	Dead	Wildtype		WHO IV	GBM	73
TCGA-06-0211-01	360	1	Dead	Wildtype		WHO IV	GBM	48
TCGA-06-0219-01	22	1	Dead	Wildtype		WHO IV	GBM	67
TCGA-06-0221-02	603	1	Dead	Mutant		WHO IV	GBM	31
TCGA-06-0238-01	405	1	Dead	Wildtype		WHO IV	GBM	47
TCGA-06-0644-01	384	1	Dead	Wildtype		WHO IV	GBM	72
TCGA-06-0645-01	175	1	Dead	Wildtype		WHO IV	GBM	56
TCGA-06-0646-01	175	1	Dead	Wildtype		WHO IV	GBM	61
TCGA-06-0649-01	64	1	Dead	Wildtype		WHO IV	GBM	73
TCGA-06-0686-01	432	1	Dead	Wildtype		WHO IV	GBM	53
TCGA-06-0743-01	803	1	Dead	Wildtype		WHO IV	GBM	70
TCGA-06-0744-01	1426	1	Dead	Wildtype		WHO IV	GBM	67
TCGA-06-0745-01	239	1	Dead	Wildtype		WHO IV	GBM	60
TCGA-06-0747-01	82	1	Dead	Wildtype		WHO IV	GBM	54
TCGA-06-0749-01	82	1	Dead	Wildtype		WHO IV	GBM	51
TCGA-06-0750-01	28	1	Dead	Wildtype		WHO IV	GBM	44
TCGA-06-0878-01	218	0	Alive	Wildtype	Un-methylated	WHO IV	GBM	75
TCGA-06-0882-01	632	1	Dead	Wildtype	Un-methylated	WHO IV	GBM	30
TCGA-06-1804-01	728	1	Dead	Wildtype	Methylated	WHO IV	GBM	82
TCGA-06-2557-01	33	1	Dead	Wildtype	Un-methylated	WHO IV	GBM	77
TCGA-06-2558-01	380	1	Dead	Wildtype	Un-methylated	WHO IV	GBM	75
TCGA-06-2559-01	150	1	Dead	Wildtype	Methylated	WHO IV	GBM	84
TCGA-06-2561-01	537	1	Dead	Wildtype	Un-methylated	WHO IV	GBM	53
TCGA-06-2562-01	382	1	Dead	Wildtype	Un-methylated	WHO IV	GBM	82
TCGA-06-2563-01	932	0	Alive	Wildtype	Methylated	WHO IV	GBM	73
TCGA-06-2564-01	181	0	Alive	Wildtype	Un-methylated	WHO IV	GBM	51
TCGA-06-2565-01	506	1	Dead	Wildtype	Methylated	WHO IV	GBM	59
TCGA-06-2567-01	133	1	Dead	Wildtype	Methylated	WHO IV	GBM	65
TCGA-06-2569-01	13	0	Alive	Wildtype	Un-methylated	WHO IV	GBM	24
TCGA-06-2570-01	958	0	Alive	Mutant	Methylated	WHO IV	GBM	22
TCGA-06-5408-01	357	1	Dead	Wildtype	Un-methylated	WHO IV	GBM	55
TCGA-06-5410-01	108	1	Dead	Wildtype	Methylated	WHO IV	GBM	72
TCGA-06-5411-01	254	1	Dead	Wildtype	Un-methylated	WHO IV	GBM	52
TCGA-06-5412-01	138	1	Dead	Wildtype	Methylated	WHO IV	GBM	79
TCGA-06-5413-01	268	0	Alive	Wildtype	Un-methylated	WHO IV	GBM	67
TCGA-06-5414-01	273	0	Alive	Wildtype	Un-methylated	WHO IV	GBM	62
TCGA-06-5415-01	260	0	Alive	Wildtype	Un-methylated	WHO IV	GBM	61
TCGA-06-5416-01	204	0	Alive	NA	Un-methylated	WHO IV	GBM	23
TCGA-06-5417-01	155	0	Alive	Mutant	Methylated	WHO IV	GBM	45
TCGA-06-5418-01	83	1	Dead	Wildtype	Un-methylated	WHO IV	GBM	76
TCGA-06-5856-01	114	1	Dead	Wildtype	Un-methylated	WHO IV	GBM	58
TCGA-06-5858-01	187	0	Alive	Wildtype	Un-methylated	WHO IV	GBM	46
TCGA-06-5859-01	139	0	Alive	Wildtype	Un-methylated	WHO IV	GBM	64
TCGA-08-0386-01	548	1	Dead	Wildtype		WHO IV	GBM	74
TCGA-12-0616-01	448	1	Dead	Wildtype		WHO IV	GBM	37
TCGA-12-0618-01	395	1	Dead	Wildtype		WHO IV	GBM	50
TCGA-12-0619-01	1062	1	Dead	Wildtype		WHO IV	GBM	60
TCGA-12-0821-01	323	1	Dead	Wildtype	Un-methylated	WHO IV	GBM	63
TCGA-12-1597-01	675	1	Dead	Wildtype	Un-methylated	WHO IV	GBM	63
TCGA-12-3650-01	333	1	Dead	Wildtype	Un-methylated	WHO IV	GBM	47
TCGA-12-3652-01	1062	1	Dead	Wildtype	Un-methylated	WHO IV	GBM	60
TCGA-12-3653-01	442	1	Dead	Wildtype	Un-methylated	WHO IV	GBM	34
TCGA-12-5295-01	454	1	Dead	Wildtype	Methylated	WHO IV	GBM	61
TCGA-12-5299-01	98	1	Dead	Wildtype	Un-methylated	WHO IV	GBM	56
TCGA-14-0736-02	460	1	Dead	NA	Un-methylated	WHO IV	GBM	50
TCGA-14-0781-01	29	1	Dead	Wildtype	Un-methylated	WHO IV	GBM	49
TCGA-14-0787-01	68	1	Dead	Wildtype	Methylated	WHO IV	GBM	69
TCGA-14-0789-01	342	1	Dead	Wildtype	Methylated	WHO IV	GBM	55
TCGA-14-0790-01	419	1	Dead	Wildtype	Methylated	WHO IV	GBM	65
TCGA-14-0817-01	164	1	Dead	Wildtype	Un-methylated	WHO IV	GBM	70
TCGA-14-0871-01	880	1	Dead	Wildtype	Un-methylated	WHO IV	GBM	75
TCGA-14-1034-01	485	1	Dead	Wildtype	Methylated	WHO IV	GBM	60
TCGA-14-1402-02	975	1	Dead	NA	Methylated	WHO IV	GBM	59
TCGA-14-1823-01	543	1	Dead	Wildtype	Methylated	WHO IV	GBM	59
TCGA-14-1825-01	232	1	Dead	Wildtype	Un-methylated	WHO IV	GBM	70
TCGA-14-1829-01	218	0	Alive	Wildtype	Un-methylated	WHO IV	GBM	57
TCGA-14-2554-01	532	1	Dead	Wildtype	Un-methylated	WHO IV	GBM	52
TCGA-15-0742-01	419	1	Dead	Wildtype		WHO IV	GBM	66
TCGA-15-1444-01	1537	1	Dead	Mutant	Methylated	WHO IV	GBM
TCGA-16-0846-01	119	1	Dead	Wildtype	Methylated	WHO IV	GBM	85
TCGA-16-1045-01	883	1	Dead	Wildtype	Methylated	WHO IV	GBM	50
TCGA-19-0957-02	666	1	Dead	Wildtype	Un-methylated	WHO IV	GBM	49
TCGA-19-1389-02	141	1	Dead	Wildtype	Un-methylated	WHO IV	GBM	51
TCGA-19-1390-01	772	1	Dead	Wildtype	Methylated	WHO IV	GBM	63
TCGA-19-1787-01	385	1	Dead	NA	Methylated	WHO IV	GBM	49
TCGA-19-2619-01	294	0	Alive	Wildtype	Methylated	WHO IV	GBM	55
TCGA-19-2620-01	148	1	Dead	Wildtype	Methylated	WHO IV	GBM	70
TCGA-19-2624-01	5	1	Dead	Wildtype	Un-methylated	WHO IV	GBM	52
TCGA-19-2625-01	124	1	Dead	Wildtype	Un-methylated	WHO IV	GBM	77
TCGA-19-2629-01	737	1	Dead	Mutant	Un-methylated	WHO IV	GBM	61
TCGA-19-4065-01	214	0	Alive	NA	Un-methylated	WHO IV	GBM
TCGA-19-5960-01	455	1	Dead	Wildtype	Un-methylated	WHO IV	GBM	57
TCGA-26-1442-01	953	0	Alive	Mutant	Methylated	WHO IV	GBM	44
TCGA-26-5132-01	286	0	Alive	Wildtype	Methylated	WHO IV	GBM	75
TCGA-26-5133-01	452	0	Alive	Wildtype	Un-methylated	WHO IV	GBM	59
TCGA-26-5134-01	167	0	Alive	Wildtype	Un-methylated	WHO IV	GBM	74
TCGA-26-5135-01	270	1	Dead	Wildtype	Methylated	WHO IV	GBM	73
TCGA-26-5136-01	577	1	Dead	Wildtype	Methylated	WHO IV	GBM	78
TCGA-26-5139-01	48	0	Alive	Wildtype	Un-methylated	WHO IV	GBM	65
TCGA-27-1830-01	154	1	Dead	Wildtype	Un-methylated	WHO IV	GBM	58
TCGA-27-1831-01	505	1	Dead	Wildtype	Un-methylated	WHO IV	GBM	67
TCGA-27-1832-01	300	1	Dead	Wildtype	Un-methylated	WHO IV	GBM	59
TCGA-27-1834-01	1233	1	Dead	Wildtype	Methylated	WHO IV	GBM	56
TCGA-27-1835-01	648	1	Dead	Wildtype	Methylated	WHO IV	GBM	53
TCGA-27-1837-01	427	1	Dead	Wildtype	Methylated	WHO IV	GBM	37
TCGA-27-2519-01	550	1	Dead	Wildtype	Un-methylated	WHO IV	GBM	49
TCGA-27-2521-01	510	1	Dead	Mutant	Methylated	WHO IV	GBM	35
TCGA-27-2523-01	489	1	Dead	Wildtype	Methylated	WHO IV	GBM	63
TCGA-27-2524-01	231	1	Dead	Wildtype	Un-methylated	WHO IV	GBM	56
TCGA-27-2526-01	87	1	Dead	Wildtype	Un-methylated	WHO IV	GBM	79
TCGA-27-2528-01	480	1	Dead	Wildtype	Methylated	WHO IV	GBM	63
TCGA-28-1747-01	77	1	Dead	Wildtype	Methylated	WHO IV	GBM	45
TCGA-28-1753-01	37	0	Alive	Wildtype	Un-methylated	WHO IV	GBM	53
TCGA-28-2499-01	95	0	Alive	Wildtype	Un-methylated	WHO IV	GBM	60
TCGA-28-2509-01	145	0	Alive	Wildtype	Methylated	WHO IV	GBM	77
TCGA-28-2513-01	222	0	Alive	Wildtype	Un-methylated	WHO IV	GBM	70
TCGA-28-2514-01	160	0	Alive	Wildtype	Un-methylated	WHO IV	GBM	46
TCGA-28-5204-01	454	1	Dead	Wildtype	Un-methylated	WHO IV	GBM	73
TCGA-28-5207-01	343	1	Dead	Wildtype	Un-methylated	WHO IV	GBM	71
TCGA-28-5208-01	544	1	Dead	Wildtype	Methylated	WHO IV	GBM	52
TCGA-28-5209-01	442	0	Alive	Wildtype	Methylated	WHO IV	GBM	67
TCGA-28-5213-01	951	0	Alive	Wildtype	Un-methylated	WHO IV	GBM	73
TCGA-28-5215-01	335	1	Dead	Wildtype	Methylated	WHO IV	GBM	62
TCGA-28-5216-01	415	0	Alive	Wildtype	Un-methylated	WHO IV	GBM	53
TCGA-28-5218-01	157	1	Dead	Wildtype	Un-methylated	WHO IV	GBM	63
TCGA-28-5220-01	388	1	Dead	Wildtype	Un-methylated	WHO IV	GBM	67
TCGA-32-1970-01	468	1	Dead	Wildtype	Un-methylated	WHO IV	GBM	59
TCGA-32-1980-01	36	1	Dead	Wildtype	Un-methylated	WHO IV	GBM	73
TCGA-32-1982-01	142	1	Dead	Wildtype	Methylated	WHO IV	GBM	76
TCGA-32-2615-01	485	1	Dead	Wildtype	Un-methylated	WHO IV	GBM	63
TCGA-32-2616-01	224	1	Dead	NA	Methylated	WHO IV	GBM	49
TCGA-32-2632-01	269	1	Dead	Wildtype	Un-methylated	WHO IV	GBM	80
TCGA-32-2634-01	693	0	Alive	Wildtype	Methylated	WHO IV	GBM	82
TCGA-32-2638-01	766	1	Dead	Wildtype	Methylated	WHO IV	GBM	68
TCGA-32-4213-01	604	0	Alive	Wildtype	Methylated	WHO IV	GBM	47
TCGA-32-5222-01	585	1	Dead	Wildtype	Methylated	WHO IV	GBM	66
TCGA-41-2571-01	26	1	Dead	Wildtype	Un-methylated	WHO IV	GBM	89
TCGA-41-2572-01	406	1	Dead	Wildtype	Un-methylated	WHO IV	GBM	67
TCGA-41-3915-01	360	1	Dead	Wildtype	Methylated	WHO IV	GBM	49
TCGA-41-4097-01	6	1	Dead	Wildtype	Un-methylated	WHO IV	GBM	63
TCGA-41-5651-01	460	1	Dead	Wildtype	Methylated	WHO IV	GBM	59
TCGA-76-4925-01	146	1	Dead	Wildtype	Methylated	WHO IV	GBM	77
TCGA-76-4926-01	138	1	Dead	Wildtype	Un-methylated	WHO IV	GBM	69
TCGA-76-4927-01	535	1	Dead	Wildtype	Un-methylated	WHO IV	GBM	58
TCGA-76-4928-01	94	1	Dead	Wildtype	Methylated	WHO IV	GBM	86
TCGA-76-4929-01	111	1	Dead	Wildtype	Methylated	WHO IV	GBM	76
TCGA-76-4931-01	279	1	Dead	Wildtype	Un-methylated	WHO IV	GBM	71
TCGA-76-4932-01	1458	1	Dead	Wildtype	Methylated	WHO IV	GBM	51
TCGA-CS-4938-01	3574	0	Alive	Mutant	Un-methylated	WHO II	LGG	31
TCGA-CS-4941-01	234	1	Dead	Wildtype	Methylated	WHO III	LGG	67
TCGA-CS-4942-01	1335	1	Dead	Mutant	Un-methylated	WHO III	LGG	44
TCGA-CS-4943-01	1106	1	Dead	Mutant	Methylated	WHO III	LGG	37
TCGA-CS-4944-01	1828	0	Alive	Mutant	Methylated	WHO II	LGG	50
TCGA-CS-5393-01	1222	0	Alive	Mutant	Methylated	WHO III	LGG	39
TCGA-CS-5394-01	8	0	Alive	Mutant	Methylated	WHO III	LGG	40
TCGA-CS-5395-01	639	1	Dead	Wildtype	Un-methylated	WHO II	LGG	43
TCGA-CS-5396-01	1631	0	Alive	Mutant	Methylated	WHO III	LGG	53
TCGA-CS-5397-01	194	1	Dead	Wildtype	Un-methylated	WHO III	LGG	54
TCGA-CS-6186-01	538	1	Dead	Wildtype	Un-methylated	WHO III	LGG	58
TCGA-CS-6188-01	814	1	Dead	Wildtype	Un-methylated	WHO III	LGG	48
TCGA-CS-6290-01	1137	1	Dead	Mutant	Methylated	WHO III	LGG	31
TCGA-CS-6665-01	1568	0	Alive	Mutant	Methylated	WHO III	LGG	51
TCGA-CS-6666-01	1428	0	Alive	Mutant	Methylated	WHO III	LGG	22
TCGA-CS-6667-01	1469	0	Alive	Mutant	Methylated	WHO II	LGG	39
TCGA-CS-6668-01	1519	0	Alive	Mutant	Methylated	WHO II	LGG	57
TCGA-CS-6669-01	1494	0	Alive	Wildtype	Un-methylated	WHO II	LGG	26
TCGA-CS-6670-01	1426	0	Alive	Mutant	Methylated	WHO III	LGG	43
TCGA-DB-5270-01	3733	0	Alive	Mutant	Methylated	WHO III	LGG	38
TCGA-DB-5273-01	2493	0	Alive	Mutant	Un-methylated	WHO III	LGG	33
TCGA-DB-5274-01	2289	0	Alive	Mutant	Methylated	WHO III	LGG	37
TCGA-DB-5275-01	1458	0	Alive	Mutant	Methylated	WHO III	LGG	36
TCGA-DB-5276-01	2218	0	Alive	Mutant	Methylated	WHO III	LGG	32
TCGA-DB-5277-01	1547	1	Dead	Mutant	Methylated	WHO III	LGG	34
TCGA-DB-5278-01	2772	0	Alive	Mutant	Methylated	WHO II	LGG	17
TCGA-DB-5279-01	1354	0	Alive	Mutant	Methylated	WHO II	LGG	59
TCGA-DB-5280-01	1112	0	Alive	Mutant	Methylated	WHO II	LGG	43
TCGA-DB-5281-01	2381	0	Alive	Mutant	Methylated	WHO III	LGG	61
TCGA-DB-A4X9-01	1412	0	Alive	Mutant	Methylated	WHO II	LGG	33
TCGA-DB-A4XA-01	573	0	Alive	Mutant	Methylated	WHO II	LGG	30
TCGA-DB-A4XB-01	919	0	Alive	Mutant	Methylated	WHO III	LGG	38
TCGA-DB-A4XC-01	1421	0	Alive	Mutant	Methylated	WHO II	LGG	26
TCGA-DB-A4XD-01	1210	0	Alive	Mutant	Methylated	WHO III	LGG	32
TCGA-DB-A4XE-01	1139	0	Alive	Mutant	Methylated	WHO III	LGG	27
TCGA-DB-A4XF-01	1021	0	Alive	Mutant	Methylated	WHO III	LGG	41
TCGA-DB-A4XG-01	2219	0	Alive	Mutant	Methylated	WHO III	LGG	34
TCGA-DB-A4XH-01	962	0	Alive	Mutant	Methylated	WHO II	LGG	53
TCGA-DB-A64L-01	736	0	Alive	Mutant	Methylated	WHO II	LGG	67
TCGA-DB-A64O-01	775	1	Dead	Wildtype	Un-methylated	WHO II	LGG	59
TCGA-DB-A64P-01	916	0	Alive	Mutant	Methylated	WHO III	LGG	40
TCGA-DB-A64Q-01	182	0	Alive	Mutant	Methylated	WHO II	LGG	31
TCGA-DB-A64R-01	955	0	Alive	Mutant	Methylated	WHO II	LGG	24
TCGA-DB-A64S-01	835	0	Alive	Mutant	Un-methylated	WHO II	LGG	20
TCGA-DB-A64U-01	846	0	Alive	Mutant	Methylated	WHO II	LGG	38
TCGA-DB-A64V-01	889	0	Alive	Mutant	Methylated	WHO II	LGG	54
TCGA-DB-A64W-01	438	1	Dead	Mutant	Methylated	WHO III	LGG	65
TCGA-DB-A64X-01	563	0	Alive	Mutant	Methylated	WHO III	LGG	56
TCGA-DB-A75K-01	368	0	Alive	Mutant	Methylated	WHO III	LGG	55
TCGA-DB-A75L-01	342	0	Alive	Mutant	Methylated	WHO III	LGG	36
TCGA-DB-A75M-01	544	0	Alive	Mutant	Methylated	WHO II	LGG	47
TCGA-DB-A75O-01	935	0	Alive	Mutant	Methylated	WHO III	LGG	29
TCGA-DB-A75P-01	492	0	Alive	Wildtype	Un-methylated	WHO II	LGG	25
TCGA-DH-5140-01	607	1	Dead	Wildtype	Un-methylated	WHO III	LGG	38
TCGA-DH-5141-01	968	0	Alive	Mutant	Methylated	WHO III	LGG	32
TCGA-DH-5142-01	1943	0	Alive	Mutant	Methylated	WHO III	LGG	29
TCGA-DH-5143-01	1401	0	Alive	Mutant	Methylated	WHO III	LGG	30
TCGA-DH-5144-01	748	0	Alive	Mutant	Methylated	WHO III	LGG	56
TCGA-DH-A669-01	919	1	Dead	Mutant	Methylated	WHO III	LGG	70
TCGA-DH-A66B-01	1279	0	Alive	Mutant	Methylated	WHO III	LGG	52
TCGA-DH-A66D-01	846	0	Alive	Mutant	Methylated	WHO III	LGG	43
TCGA-DH-A66F-01	523	0	Alive	Mutant	Methylated	WHO II	LGG	49
TCGA-DH-A66G-01	523	0	Alive	Mutant	Methylated	WHO III	LGG	49
TCGA-DH-A7UR-01	1650	0	Alive	Mutant	Methylated	WHO III	LGG	59
TCGA-DH-A7US-01	706	0	Alive	Mutant	Methylated	WHO II	LGG	50
TCGA-DH-A7UT-01	531	1	Dead	Mutant	Methylated	WHO III	LGG	30
TCGA-DH-A7UU-01	417	0	Alive	Mutant	Methylated	WHO III	LGG	43
TCGA-DH-A7UV-01	566	0	Alive	Mutant	Methylated	WHO III	LGG	49
TCGA-DU-5847-01	548	0	Alive	Wildtype	Methylated	WHO III	LGG	34
TCGA-DU-5849-01	443	0	Alive	Mutant	Methylated	WHO II	LGG	48
TCGA-DU-5851-01	531	0	Alive	Mutant	Un-methylated	WHO III	LGG	40
TCGA-DU-5852-01	205	1	Dead	Wildtype	Methylated	WHO III	LGG	61
TCGA-DU-5853-01	407	0	Alive	Mutant	Methylated	WHO II	LGG	29
TCGA-DU-5854-01	257	0	Alive	Wildtype	Un-methylated	WHO III	LGG	57
TCGA-DU-5855-01	207	0	Alive	Mutant	Methylated	WHO III	LGG	49
TCGA-DU-5870-01	5546	0	Alive	Mutant	Methylated	WHO II	LGG	34
TCGA-DU-5871-01	576	0	Alive	Mutant	Methylated	WHO II	LGG	37
TCGA-DU-5872-01	532	0	Alive	Mutant	Methylated	WHO II	LGG	43
TCGA-DU-5874-01	461	0	Alive	Mutant	Methylated	WHO II	LGG	62
TCGA-DU-6392-01	6423	0	Alive	Wildtype	Un-methylated	WHO III	LGG	35
TCGA-DU-6393-01	1585	1	Dead	Mutant	Methylated	WHO III	LGG	66
TCGA-DU-6394-01	682	1	Dead	Mutant	Methylated	WHO III	LGG	53
TCGA-DU-6395-01	1491	1	Dead	Mutant	Methylated	WHO II	LGG	31
TCGA-DU-6396-01	2286	1	Dead	Mutant	Methylated	WHO III	LGG	31
TCGA-DU-6397-01	1401	1	Dead	Mutant	Methylated	WHO III	LGG	45
TCGA-DU-6399-01	2000	1	Dead	Mutant	Methylated	WHO II	LGG	54
TCGA-DU-6400-01	37	1	Dead	Mutant	Methylated	WHO II	LGG	66
TCGA-DU-6401-01	2660	1	Dead	Mutant	Methylated	WHO II	LGG	31
TCGA-DU-6402-01	214	1	Dead	Wildtype	Un-methylated	WHO III	LGG	52
TCGA-DU-6403-01	354	1	Dead	Wildtype	Un-methylated	WHO III	LGG	60
TCGA-DU-6404-01	4068	1	Dead	Wildtype	Un-methylated	WHO III	LGG	24
TCGA-DU-6405-01	605	1	Dead	Wildtype	Methylated	WHO III	LGG	51
TCGA-DU-6406-01	512	1	Dead	Wildtype	Un-methylated	WHO III	LGG	59
TCGA-DU-6407-01	2875	1	Dead	Mutant	Methylated	WHO II	LGG	35
TCGA-DU-6408-01	3470	1	Dead	Mutant	Methylated	WHO III	LGG	23
TCGA-DU-6410-01	242	0	Alive	Mutant	Methylated	WHO III	LGG	56
TCGA-DU-6542-01	73	0	Alive	Mutant	Methylated	WHO III	LGG	25
TCGA-DU-7006-01	349	1	Dead	Wildtype	Methylated	WHO III	LGG	60
TCGA-DU-7007-01	1915	1	Dead	Mutant	Methylated	WHO II	LGG	33
TCGA-DU-7008-01	4752	0	Alive	Mutant	Methylated	WHO II	LGG	41
TCGA-DU-7009-01	4695	1	Dead	Mutant	Methylated	WHO II	LGG	32
TCGA-DU-7010-01	456	1	Dead	Mutant	Methylated	WHO III	LGG	58
TCGA-DU-7011-01	3200	1	Dead	Mutant	Un-methylated	WHO II	LGG	25
TCGA-DU-7012-01	199	1	Dead	Wildtype	Methylated	WHO III	LGG	74
TCGA-DU-7013-01	269	1	Dead	Wildtype	Un-methylated	WHO III	LGG	59
TCGA-DU-7014-01	3571	1	Dead	NA	Methylated	WHO II	LGG	59
TCGA-DU-7015-01	2761	0	Alive	Mutant	Methylated	WHO II	LGG	41
TCGA-DU-7018-01	933	1	Dead	Mutant	Methylated	WHO III	LGG	57
TCGA-DU-7019-01	800	0	Alive	Mutant	Methylated		LGG	39
TCGA-DU-7290-01	315	1	Dead	Wildtype	Un-methylated	WHO III	LGG	45
TCGA-DU-7292-01	242	1	Dead	Wildtype	Methylated	WHO III	LGG	69
TCGA-DU-7294-01	2869	0	Alive	Mutant	Methylated	WHO II	LGG	53
TCGA-DU-7298-01	576	1	Dead	Mutant	Methylated	WHO III	LGG	38
TCGA-DU-7299-01	1339	1	Dead	Mutant	Methylated	WHO III	LGG	33
TCGA-DU-7300-01	1886	1	Dead	Mutant	Methylated	WHO III	LGG	53
TCGA-DU-7301-01	788	1	Dead	Mutant	Methylated	WHO II	LGG	53
TCGA-DU-7302-01	1834	0	Alive	Mutant	Methylated	WHO III	LGG	48
TCGA-DU-7304-01	709	1	Dead	Mutant	Methylated	WHO III	LGG	43
TCGA-DU-7306-01	1277	0	Alive	Mutant	Methylated	WHO II	LGG	67
TCGA-DU-7309-01	84	0	Alive	Mutant	Methylated	WHO III	LGG	41
TCGA-DU-8158-01	155	1	Dead	Wildtype	Un-methylated	WHO III	LGG	57
TCGA-DU-8161-01	722	1	Dead	Wildtype	Un-methylated	WHO III	LGG	63
TCGA-DU-8162-01	444	1	Dead	Wildtype	Un-methylated	WHO III	LGG	61
TCGA-DU-8163-01	629	0	Alive	Mutant	Un-methylated	WHO III	LGG	29
TCGA-DU-8164-01	651	0	Alive	Mutant	Methylated	WHO II	LGG	51
TCGA-DU-8165-01	582	0	Alive	Wildtype	Un-methylated	WHO III	LGG	60
TCGA-DU-8166-01	516	0	Alive	Mutant	Methylated	WHO II	LGG	29
TCGA-DU-8167-01	471	0	Alive	Mutant	Methylated	WHO II	LGG	69
TCGA-DU-8168-01	431	0	Alive	Mutant	Methylated	WHO III	LGG	55
TCGA-DU-A5TP-01	1012	0	Alive	Mutant	Methylated	WHO III	LGG	33
TCGA-DU-A5TR-01	908	0	Alive	Mutant	Methylated	WHO II	LGG	51
TCGA-DU-A5TS-01	964	0	Alive	Mutant	Methylated	WHO II	LGG	42
TCGA-DU-A5TT-01	743	0	Alive	Wildtype	Methylated	WHO III	LGG	70
TCGA-DU-A5TU-01	796	0	Alive	Mutant	Methylated	WHO II	LGG	62
TCGA-DU-A5TW-01	760	0	Alive	Mutant	Methylated	WHO III	LGG	33
TCGA-DU-A5TY-01	1033	1	Dead	Wildtype	Methylated	WHO III	LGG	46
TCGA-DU-A6S2-01	777	0	Alive	Mutant	Methylated	WHO II	LGG	37
TCGA-DU-A6S3-01	656	0	Alive	Mutant	Methylated	WHO II	LGG	60
TCGA-DU-A6S6-01	2893	0	Alive	Mutant	Methylated	WHO II	LGG	35
TCGA-DU-A6S7-01	638	0	Alive	Mutant	Methylated	WHO III	LGG	27
TCGA-DU-A6S8-01	678	0	Alive	Mutant	Methylated	WHO III	LGG	74
TCGA-DU-A76K-01	347	1	Dead	Wildtype	Un-methylated	WHO II	LGG	87
TCGA-DU-A76L-01	814	1	Dead	Wildtype	Methylated	WHO III	LGG	54
TCGA-DU-A76O-01	522	0	Alive	Mutant	Methylated	WHO II	LGG	30
TCGA-DU-A76R-01	648	1	Dead	Mutant	Methylated	WHO III	LGG	51
TCGA-DU-A7T6-01	547	1	Dead	Mutant	Methylated	WHO III	LGG	73
TCGA-DU-A7T8-01	4229	1	Dead	Mutant	Methylated	WHO III	LGG	35
TCGA-DU-A7TA-01	2565	0	Alive	Mutant	Methylated	WHO II	LGG	32
TCGA-DU-A7TB-01	1567	0	Alive	Wildtype	Un-methylated	WHO II	LGG	56
TCGA-DU-A7TC-01	1137	0	Alive	Mutant	Methylated	WHO II	LGG	32
TCGA-DU-A7TD-01	228	1	Dead	Wildtype	Un-methylated	WHO III	LGG	52
TCGA-DU-A7TG-01	1351	1	Dead	Mutant	Methylated	WHO II	LGG	40
TCGA-DU-A7TI-01	1183	1	Dead	NA	Methylated	WHO III	LGG	32
TCGA-DU-A7TJ-01	17	0	Alive	Wildtype	Methylated	WHO III	LGG	55
TCGA-E1-5302-01	1525	1	Dead	Mutant	Methylated	WHO III	LGG	41
TCGA-E1-5303-01	2052	1	Dead	Mutant	Methylated	WHO III	LGG	38
TCGA-E1-5304-01	1251	1	Dead	Mutant	Un-methylated	WHO III	LGG	42
TCGA-E1-5305-01	2433	1	Dead	Mutant	Methylated	WHO III	LGG	34
TCGA-E1-5307-01	1762	1	Dead	Mutant	Methylated	WHO III	LGG	62
TCGA-E1-5311-01	4084	1	Dead	Mutant	Methylated	WHO III	LGG	31
TCGA-E1-5318-01	2379	1	Dead	Mutant	Methylated	WHO II	LGG	42
TCGA-E1-5319-01	2907	1	Dead	Mutant	Methylated	WHO II	LGG	48
TCGA-E1-5322-01	3978	1	Dead	Mutant	Methylated	WHO II	LGG	38
TCGA-E1-A7YD-01	435	1	Dead	Wildtype	Un-methylated	WHO III	LGG	57
TCGA-E1-A7YE-01	886	1	Dead	Mutant	Un-methylated	WHO III	LGG	32
TCGA-E1-A7YH-01	2835	1	Dead	Mutant	Methylated	WHO III	LGG	47
TCGA-E1-A7YI-01	111	1	Dead	Mutant	Methylated	WHO III	LGG	33
TCGA-E1-A7YJ-01	592	1	Dead	Wildtype	Un-methylated	WHO III	LGG	55
TCGA-E1-A7YK-01	378	1	Dead	Mutant	Methylated	WHO III	LGG	52
TCGA-E1-A7YL-01	492	1	Dead	Wildtype	Un-methylated	WHO III	LGG	46
TCGA-E1-A7YM-01	648	1	Dead	Wildtype	Un-methylated	WHO III	LGG	63
TCGA-E1-A7YN-01	727	1	Dead	Wildtype	Methylated	WHO III	LGG	63
TCGA-E1-A7YO-01	2282	1	Dead	Mutant	Methylated	WHO III	LGG	45
TCGA-E1-A7YQ-01	1578	1	Dead	Wildtype	Un-methylated	WHO III	LGG	58
TCGA-E1-A7YS-01	466	1	Dead	Mutant	Methylated	WHO III	LGG	71
TCGA-E1-A7YU-01	23	1	Dead	Mutant	Methylated	WHO III	LGG	42
TCGA-E1-A7YV-01	987	1	Dead	Mutant	Methylated	WHO III	LGG	26
TCGA-E1-A7YW-01	1120	1	Dead	Mutant	Methylated	WHO II	LGG	28
TCGA-E1-A7YY-01	4445	1	Dead	Mutant	Methylated	WHO II	LGG	27
TCGA-E1-A7Z2-01	398	1	Dead	Wildtype	Un-methylated	WHO II	LGG	58
TCGA-E1-A7Z3-01	2235	1	Dead	Mutant	Methylated	WHO II	LGG	31
TCGA-E1-A7Z4-01	4412	1	Dead	Mutant	Methylated	WHO II	LGG	35
TCGA-E1-A7Z6-01	984	1	Dead	Mutant	Methylated	WHO II	LGG	41
TCGA-EZ-7264-01	1201	0	Alive	Mutant	Methylated	WHO II	LGG	47
TCGA-F6-A8O3-01	7	0	Alive	Mutant	Methylated	WHO II	LGG	34
TCGA-F6-A8O4-01	6	0	Alive	Mutant	Methylated	WHO II	LGG	44
TCGA-FG-5962-01	1453	0	Alive	Mutant	Methylated	WHO III	LGG	54
TCGA-FG-5963-01	775	1	Dead	Wildtype	Un-methylated	WHO III	LGG	23
TCGA-FG-5964-01	1588	0	Alive	Mutant	Methylated	WHO II	LGG	62
TCGA-FG-5965-01	1120	1	Dead	Mutant	Methylated	WHO II	LGG	39
TCGA-FG-6688-01	571	0	Alive	Wildtype	Methylated	WHO III	LGG	59
TCGA-FG-6689-01	454	0	Alive	Mutant	Methylated	WHO II	LGG	30
TCGA-FG-6690-01	1294	0	Alive	Mutant	Methylated	WHO II	LGG	70
TCGA-FG-6691-01	1257	0	Alive	Mutant	Un-methylated	WHO II	LGG	23
TCGA-FG-6692-01	561	1	Dead	Wildtype	Methylated	WHO III	LGG	63
TCGA-FG-7634-01	467	0	Alive	Mutant	Methylated	WHO II	LGG	28
TCGA-FG-7636-01	544	0	Alive	Mutant	Methylated	WHO III	LGG	48
TCGA-FG-7637-01	1219	0	Alive	Mutant	Methylated	WHO II	LGG	49
TCGA-FG-7638-01	686	0	Alive	Mutant	Methylated	WHO III	LGG	31
TCGA-FG-7641-01	627	0	Alive	Mutant	Methylated	WHO II	LGG	31
TCGA-FG-7643-01	611	0	Alive	Wildtype	Methylated	WHO II	LGG	49
TCGA-FG-8181-01	862	0	Alive	Wildtype	Un-methylated	WHO III	LGG	23
TCGA-FG-8182-01	416	0	Alive	Mutant	Methylated	WHO II	LGG	35
TCGA-FG-8185-01	433	0	Alive	Mutant	Methylated	WHO III	LGG	37
TCGA-FG-8186-01	487	0	Alive	Mutant	Methylated	WHO III	LGG	42
TCGA-FG-8187-01	611	0	Alive	Mutant	Methylated	WHO II	LGG	31
TCGA-FG-8188-01	455	0	Alive	Mutant	Methylated	WHO II	LGG	41
TCGA-FG-8189-01	685	0	Alive	Mutant	Methylated	WHO II	LGG	33
TCGA-FG-8191-01	992	0	Alive	Mutant	Un-methylated	WHO III	LGG	30
TCGA-FG-A4MT-01	1164	0	Alive	Mutant	Methylated	WHO II	LGG	27
TCGA-FG-A4MU-01	326	0	Alive	Wildtype	Methylated	WHO III	LGG	58
TCGA-FG-A4MW-01	559	1	Dead	Wildtype	Methylated	WHO III	LGG	63
TCGA-FG-A4MX-01	569	0	Alive	Mutant	Methylated	WHO II	LGG	47
TCGA-FG-A4MY-01	721	0	Alive	Mutant	Methylated	WHO II	LGG	44
TCGA-FG-A60J-01	449	0	Alive	Mutant	Methylated	WHO II	LGG	47
TCGA-FG-A60K-01	542	0	Alive	Mutant	Methylated	WHO II	LGG	34
TCGA-FG-A60L-01	655	0	Alive	Mutant	Methylated	WHO II	LGG	34
TCGA-FG-A6IZ-01	457	0	Alive	Mutant	Methylated	WHO II	LGG	60
TCGA-FG-A6J1-01	500	0	Alive	Mutant	Methylated	WHO II	LGG	44
TCGA-FG-A6J3-01	677	0	Alive	Mutant	Methylated	WHO III	LGG	52
TCGA-FG-A70Y-01	868	0	Alive	Mutant	Methylated	WHO II	LGG	20
TCGA-FG-A70Z-01	328	0	Alive	Wildtype	Methylated	WHO III	LGG	53
TCGA-FG-A710-01	1115	0	Alive	Mutant	Methylated	WHO II	LGG	50
TCGA-FG-A711-01	1481	1	Dead	Mutant	Un-methylated	WHO II	LGG	33
TCGA-FG-A713-01	622	0	Alive	Mutant	Methylated	WHO II	LGG	74
TCGA-FG-A87N-01	567	0	Alive	Mutant	Methylated	WHO III	LGG	37
TCGA-FG-A87Q-01	174	0	Alive	Wildtype	Methylated	WHO III	LGG	61
TCGA-FN-7833-01	837	0	Alive	Mutant	Methylated	WHO III	LGG	25
TCGA-HT-7467-01	3	0	Alive	Mutant	Methylated	WHO II	LGG	54
TCGA-HT-7468-01	203	0	Alive	Mutant	Methylated	WHO III	LGG	30
TCGA-HT-7469-01	351	1	Dead	Wildtype	Methylated	WHO III	LGG	30
TCGA-HT-7470-01	1220	1	Dead	Mutant	Methylated	WHO III	LGG	37
TCGA-HT-7471-01	4	0	Alive	Mutant	Methylated	WHO III	LGG	37
TCGA-HT-7472-01	1	0	Alive	Mutant	Methylated	WHO II	LGG	38
TCGA-HT-7473-01	503	0	Alive	Mutant	Un-methylated	WHO II	LGG	28
TCGA-HT-7474-01	114	0	Alive	Mutant	Methylated	WHO II	LGG	52
TCGA-HT-7475-01	530	0	Alive	Mutant	Methylated	WHO III	LGG	67
TCGA-HT-7476-01	199	0	Alive	Mutant	Methylated	WHO II	LGG	26
TCGA-HT-7477-01	738	0	Alive	Mutant	Methylated	WHO III	LGG	62
TCGA-HT-7478-01	194	0	Alive	Mutant	Un-methylated	WHO II	LGG	36
TCGA-HT-7479-01	1227	0	Alive	Mutant	Methylated	WHO III	LGG	44
TCGA-HT-7480-01	2287	0	Alive	Mutant	Methylated	WHO II	LGG	33
TCGA-HT-7481-01	2918	0	Alive	Mutant	Methylated	WHO II	LGG	39
TCGA-HT-7482-01	3253	0	Alive	Mutant	Methylated	WHO II	LGG	18
TCGA-HT-7483-01	5255	0	Alive	Mutant	Un-methylated	WHO II	LGG	14
TCGA-HT-7485-01	122	0	Alive	Mutant	Methylated	WHO II	LGG	42
TCGA-HT-7601-01	153	0	Alive	Mutant	Methylated	WHO III	LGG	30
TCGA-HT-7602-01	908	0	Alive	Mutant	Methylated	WHO II	LGG	21
TCGA-HT-7603-01	705	0	Alive	Mutant	Methylated	WHO II	LGG	29
TCGA-HT-7604-01	3725	0	Alive	Mutant	Methylated	WHO II	LGG	50
TCGA-HT-7605-01	139	0	Alive	Mutant	Methylated	WHO II	LGG	38
TCGA-HT-7606-01	526	0	Alive	Mutant	Un-methylated	WHO II	LGG	30
TCGA-HT-7607-01	96	1	Dead	Mutant	Methylated	WHO II	LGG	61
TCGA-HT-7608-01	671	0	Alive	Mutant	Methylated	WHO II	LGG	61
TCGA-HT-7609-01	1399	0	Alive	Mutant	Methylated	WHO III	LGG	34
TCGA-HT-7610-01	1706	0	Alive	Mutant	Methylated	WHO II	LGG	25
TCGA-HT-7611-01	1752	0	Alive	Mutant	Methylated	WHO II	LGG	36
TCGA-HT-7616-01	7	1	Dead	Mutant	Methylated	WHO III	LGG	75
TCGA-HT-7620-01	434	0	Alive	Mutant	Methylated	WHO III	LGG	40
TCGA-HT-7676-01	5	0	Alive	Mutant	Un-methylated	WHO II	LGG	26
TCGA-HT-7677-01	494	0	Alive	Mutant	Methylated	WHO III	LGG	53
TCGA-HT-7680-01	23	0	Alive	Wildtype	Un-methylated	WHO II	LGG	32
TCGA-HT-7681-01	1359	0	Alive	Mutant	Methylated	WHO II	LGG	29
TCGA-HT-7684-01	184	0	Alive	Mutant	Methylated	WHO III	LGG	58
TCGA-HT-7686-01	1300	0	Alive	Mutant	Methylated	WHO III	LGG	29
TCGA-HT-7687-01	3	0	Alive	Mutant	Methylated	WHO III	LGG	74
TCGA-HT-7688-01	964	0	Alive	Mutant	Methylated	WHO III	LGG	59
TCGA-HT-7689-01	455	0	Alive	Mutant	Methylated	WHO II	LGG	58
TCGA-HT-7690-01	3	0	Alive	Mutant	Methylated	WHO III	LGG	29
TCGA-HT-7691-01	3	0	Alive	Wildtype	Un-methylated	WHO II	LGG	31
TCGA-HT-7692-01	90	0	Alive	Mutant	Methylated	WHO II	LGG	43
TCGA-HT-7693-01	533	0	Alive	Mutant	Methylated	WHO II	LGG	51
TCGA-HT-7694-01	210	0	Alive	Mutant	Methylated	WHO III	LGG	60
TCGA-HT-7695-01	442	0	Alive	Mutant	Methylated	WHO II	LGG	29
TCGA-HT-7854-01	1201	0	Alive	Wildtype	Un-methylated	WHO II	LGG	62
TCGA-HT-7855-01	585	0	Alive	Mutant	Methylated	WHO III	LGG	39
TCGA-HT-7856-01	1189	0	Alive	Mutant	Methylated	WHO III	LGG	35
TCGA-HT-7857-01	7	0	Alive	Wildtype	Un-methylated	WHO III	LGG	24
TCGA-HT-7858-01	1540	0	Alive	Mutant	Methylated	WHO II	LGG	28
TCGA-HT-7860-01	15	0	Alive	Wildtype	Methylated	WHO III	LGG	60
TCGA-HT-7873-01	718	0	Alive	Mutant	Methylated	WHO II	LGG	29
TCGA-HT-7874-01	1130	0	Alive	Mutant	Methylated	WHO III	LGG	41
TCGA-HT-7875-01	10	0	Alive	Mutant	Methylated	WHO II	LGG	56
TCGA-HT-7877-01	4	0	Alive	Mutant	Methylated	WHO II	LGG	20
TCGA-HT-7879-01	112	0	Alive	Mutant	Methylated	WHO III	LGG	31
TCGA-HT-7880-01	162	0	Alive	Mutant	Methylated	WHO II	LGG	30
TCGA-HT-7881-01	1079	0	Alive	Mutant	Methylated	WHO II	LGG	38
TCGA-HT-7882-01	113	1	Dead	Wildtype	Methylated	WHO III	LGG	66
TCGA-HT-7884-01	343	0	Alive	Mutant	Methylated	WHO II	LGG	44
TCGA-HT-7902-01	956	0	Alive	Mutant	Methylated	WHO II	LGG	30
TCGA-HT-8010-01	50	0	Alive	Mutant	Methylated	WHO II	LGG	64
TCGA-HT-8011-01	494	0	Alive	Wildtype	Un-methylated	WHO III	LGG	55
TCGA-HT-8012-01	286	0	Alive	Mutant	Methylated	WHO II	LGG	30
TCGA-HT-8013-01	1933	1	Dead	Mutant	Methylated	WHO II	LGG	37
TCGA-HT-8015-01	3	0	Alive	Wildtype	Un-methylated	WHO II	LGG	21
TCGA-HT-8018-01	1152	1	Dead	Mutant	Methylated	WHO II	LGG	40
TCGA-HT-8019-01	1004	0	Alive	Wildtype	Un-methylated	WHO III	LGG	34
TCGA-HT-8104-01	372	0	Alive	Wildtype	Un-methylated	WHO III	LGG	51
TCGA-HT-8105-01	190	0	Alive	Mutant	Methylated	WHO III	LGG	54
TCGA-HT-8106-01	3	0	Alive	Mutant	Methylated	WHO III	LGG	53
TCGA-HT-8107-01	14	0	Alive	Wildtype	Methylated	WHO II	LGG	62
TCGA-HT-8108-01	76	0	Alive	Mutant	Methylated	WHO II	LGG	26
TCGA-HT-8109-01	169	0	Alive	Mutant	Methylated	WHO III	LGG	64
TCGA-HT-8110-01	419	0	Alive	Wildtype	Methylated	WHO III	LGG	57
TCGA-HT-8111-01	7	0	Alive	Mutant	Methylated	WHO III	LGG	32
TCGA-HT-8113-01	900	0	Alive	Mutant	Methylated	WHO II	LGG	49
TCGA-HT-8114-01	1040	0	Alive	Mutant	Methylated	WHO III	LGG	36
TCGA-HT-8558-01	418	0	Alive	Wildtype	Un-methylated	WHO II	LGG	29
TCGA-HT-8563-01	860	0	Alive	Mutant	Un-methylated	WHO III	LGG	30
TCGA-HT-8564-01	478	0	Alive	Wildtype	Un-methylated	WHO III	LGG	47
TCGA-HT-A4DS-01	7	0	Alive	Wildtype	Un-methylated	WHO III	LGG	55
TCGA-HT-A4DV-01	792	0	Alive	Mutant	Methylated	WHO III	LGG	51
TCGA-HT-A5R5-01	4	0	Alive	Mutant	Methylated	WHO II	LGG	33
TCGA-HT-A5R7-01	615	0	Alive	Mutant	Methylated	WHO III	LGG	33
TCGA-HT-A5R9-01	2	0	Alive	Mutant	Methylated	WHO III	LGG	48
TCGA-HT-A5RA-01	832	0	Alive	Wildtype	Un-methylated	WHO III	LGG	65
TCGA-HT-A5RB-01	3	0	Alive	Mutant	Methylated	WHO II	LGG	24
TCGA-HT-A5RC-01	162	1	Dead	Wildtype	Un-methylated	WHO III	LGG	70
TCGA-HT-A614-01	82	0	Alive	Mutant	Methylated	WHO II	LGG	47
TCGA-HT-A615-01	515	0	Alive	Mutant	Methylated	WHO II	LGG	38
TCGA-HT-A616-01	55	0	Alive	Mutant	Methylated	WHO II	LGG	36
TCGA-HT-A617-01	491	0	Alive	Wildtype	Un-methylated	WHO II	LGG	47
TCGA-HT-A618-01	512	0	Alive	Mutant	Methylated	WHO III	LGG	37
TCGA-HT-A619-01	651	0	Alive	Mutant	Methylated	WHO III	LGG	51
TCGA-HT-A61A-01	194	0	Alive	Mutant	Methylated	WHO II	LGG	20
TCGA-HT-A61B-01	533	0	Alive	Mutant	Methylated	WHO III	LGG	22
TCGA-HT-A61C-01	537	1	Dead	Wildtype	Un-methylated	WHO III	LGG	66
TCGA-HT-A74H-01	74	0	Alive	Wildtype	Un-methylated	WHO III	LGG	62
TCGA-HT-A74J-01	320	0	Alive	Mutant	Un-methylated	WHO II	LGG	33
TCGA-HT-A74K-01	467	0	Alive	Mutant	Methylated	WHO III	LGG	58
TCGA-HT-A74L-01	336	0	Alive	Mutant	Methylated	WHO II	LGG	22
TCGA-HT-A74O-01	3	0	Alive	Mutant	Methylated	WHO III	LGG	34
TCGA-HW-7486-01	1721	0	Alive	Mutant	Methylated	WHO II	LGG	37
TCGA-HW-7487-01	1382	0	Alive	Mutant	Methylated	WHO II	LGG	39
TCGA-HW-7489-01	1262	1	Dead	Mutant	Methylated	WHO II	LGG	38
TCGA-HW-7490-01	1387	0	Alive	Mutant	Methylated	WHO II	LGG	41
TCGA-HW-7491-01	2078	0	Alive	Mutant	Un-methylated	WHO II	LGG	35
TCGA-HW-7493-01	2107	0	Alive	NA	Methylated	WHO II	LGG	40
TCGA-HW-7495-01	1078	0	Alive	Mutant	Methylated	WHO II	LGG	45
TCGA-HW-8319-01	1209	1	Dead	Mutant	Un-methylated	WHO III	LGG	34
TCGA-HW-8320-01	1217	0	Alive	Mutant	Methylated	WHO III	LGG	36
TCGA-HW-8321-01	1294	0	Alive	Mutant	Methylated	WHO III	LGG	31
TCGA-HW-8322-01	758	0	Alive	Mutant	Methylated	WHO II	LGG	39
TCGA-HW-A5KJ-01	962	1	Dead	Mutant	Methylated	WHO III	LGG	68
TCGA-HW-A5KK-01	388	1	Dead	Wildtype	Methylated	WHO III	LGG	64
TCGA-HW-A5KL-01	878	0	Alive	Mutant	Methylated	WHO II	LGG	42
TCGA-HW-A5KM-01	630	0	Alive	Mutant	Methylated	WHO II	LGG	35
TCGA-IK-7675-01	578	1	Dead	Mutant	Methylated	WHO II	LGG	43
TCGA-IK-8125-01	1301	0	Alive	Mutant	Methylated	WHO III	LGG	62
TCGA-KT-A74X-01	438	0	Alive	Mutant	Methylated	WHO III	LGG	26
TCGA-KT-A7W1-01	438	0	Alive	Wildtype	Methylated	WHO III	LGG	45
TCGA-P5-A5ET-01		0	Alive	Mutant	Methylated	WHO II	LGG	27
TCGA-P5-A5EU-01		0	Alive	Mutant	Un-methylated	WHO III	LGG	35
TCGA-P5-A5EV-01	7	0	Alive	Mutant	Methylated	WHO II	LGG	39
TCGA-P5-A5EW-01	204	0	Alive	Mutant	Methylated	WHO II	LGG	20
TCGA-P5-A5EX-01	243	0	Alive	Mutant	Methylated	WHO III	LGG	41
TCGA-P5-A5EY-01	72	0	Alive	Wildtype	Un-methylated	WHO II	LGG	21
TCGA-P5-A5EZ-01	70	0	Alive	Mutant	Methylated	WHO III	LGG	39
TCGA-P5-A5F0-01	287	0	Alive	Mutant	Methylated	WHO II	LGG	33
TCGA-P5-A5F1-01	179	0	Alive	Mutant	Un-methylated	WHO II	LGG	30
TCGA-P5-A5F2-01	242	0	Alive	Mutant	Methylated	WHO II	LGG	36
TCGA-P5-A5F4-01	231	0	Alive	Mutant	Methylated	WHO III	LGG	35
TCGA-P5-A5F6-01	39	0	Alive	Wildtype	Un-methylated	WHO II	LGG	26
TCGA-P5-A72U-01	7	0	Alive	Wildtype	Methylated	WHO III	LGG	71
TCGA-P5-A72W-01	317	0	Alive	Mutant	Un-methylated	WHO III	LGG	35
TCGA-P5-A72X-01	403	0	Alive	Mutant	Methylated	WHO III	LGG	21
TCGA-P5-A72Z-01	354	0	Alive	Mutant	Methylated	WHO III	LGG	64
TCGA-P5-A730-01	333	0	Alive	Mutant	Methylated	WHO III	LGG	22
TCGA-P5-A731-01	274	0	Alive	Mutant	Methylated	WHO II	LGG	59
TCGA-P5-A733-01	414	0	Alive	Mutant	Methylated	WHO II	LGG	52
TCGA-P5-A735-01	292	0	Alive	Mutant	Methylated	WHO II	LGG	38
TCGA-P5-A736-01	230	0	Alive	Mutant	Methylated	WHO III	LGG	44
TCGA-P5-A737-01	372	0	Alive	Mutant	Methylated	WHO II	LGG	47
TCGA-P5-A77W-01	584	0	Alive	Mutant	Methylated	WHO III	LGG	37
TCGA-P5-A77X-01	105	0	Alive	Mutant	Methylated	WHO II	LGG	55
TCGA-P5-A780-01	72	0	Alive	Mutant	Methylated	WHO III	LGG	44
TCGA-P5-A781-01	134	0	Alive	Mutant	Methylated	WHO III	LGG	34
TCGA-QH-A65R-01	461	0	Alive	Mutant	Methylated	WHO III	LGG	38
TCGA-QH-A65S-01	77	0	Alive	Mutant	Methylated	WHO II	LGG	32
TCGA-QH-A65V-01	384	0	Alive	Mutant	Methylated	WHO II	LGG	43
TCGA-QH-A65X-01	482	0	Alive	Mutant	Methylated	WHO III	LGG	28
TCGA-QH-A65Z-01	427	0	Alive	Mutant	Methylated	WHO II	LGG	54
TCGA-QH-A6CS-01	588	0	Alive	Wildtype	Un-methylated	WHO III	LGG	41
TCGA-QH-A6CU-01	451	0	Alive	Mutant	Methylated	WHO III	LGG	52
TCGA-QH-A6CV-01	442	0	Alive	Wildtype	Un-methylated	WHO III	LGG	51
TCGA-QH-A6CW-01	414	0	Alive	Mutant	Methylated	WHO III	LGG	43
TCGA-QH-A6CX-01	372	1	Dead	Wildtype	Un-methylated	WHO II	LGG	66
TCGA-QH-A6CY-01	408	0	Alive	Mutant	Methylated	WHO III	LGG	38
TCGA-QH-A6CZ-01	279	0	Alive	Mutant	Methylated	WHO II	LGG	38
TCGA-QH-A6X3-01	313	0	Alive	Mutant	Methylated	WHO II	LGG	27
TCGA-QH-A6X4-01	442	0	Alive	Mutant	Methylated	WHO III	LGG	47
TCGA-QH-A6X5-01	497	0	Alive	Mutant	Methylated	WHO II	LGG	58
TCGA-QH-A6X8-01	509	0	Alive	Mutant	Methylated	WHO III	LGG	56
TCGA-QH-A6X9-01	58	0	Alive	Mutant	Methylated	WHO II	LGG	73
TCGA-QH-A6XA-01	502	0	Alive	Mutant	Methylated	WHO II	LGG	23
TCGA-QH-A6XC-01	508	0	Alive	Wildtype	Methylated	WHO III	LGG	48
TCGA-QH-A86X-01	337	0	Alive	Mutant	Methylated	WHO II	LGG	33
TCGA-QH-A870-01	395	0	Alive	Mutant	Methylated	WHO III	LGG	38
TCGA-R8-A6MK-01	2702	0	Alive	Mutant	Methylated	WHO II	LGG	40
TCGA-R8-A6ML-01	2860	0	Alive	Mutant	Methylated	WHO III	LGG	52
TCGA-R8-A6MO-01	993	0	Alive	Mutant	Methylated	WHO II	LGG	53
TCGA-R8-A73M-01	1806	0	Alive	Mutant	Methylated	WHO II	LGG	48
TCGA-RY-A83X-01	939	0	Alive	Mutant	Methylated	WHO II	LGG	46
TCGA-RY-A83Y-01	166	0	Alive	Mutant	Methylated	WHO II	LGG	45
TCGA-RY-A83Z-01	301	0	Alive	Mutant	Methylated	WHO III	LGG	54
TCGA-RY-A840-01	854	0	Alive	Mutant	Methylated	WHO III	LGG	47
TCGA-RY-A843-01	63	0	Alive	Mutant	Methylated	WHO III	LGG	30
TCGA-RY-A845-01	596	0	Alive	Mutant	Methylated	WHO II	LGG	40
TCGA-RY-A847-01	933	0	Alive	Mutant	Methylated	WHO II	LGG	45
TCGA-S9-A6TS-01	1891	1	Dead	Mutant	Methylated	WHO III	LGG	48
TCGA-S9-A6TU-01	2650	0	Alive	Mutant	Methylated	WHO II	LGG	38
TCGA-S9-A6TV-01	571	0	Alive	Mutant	Methylated	WHO III	LGG	50
TCGA-S9-A6TW-01	1250	0	Alive	Mutant	Methylated	WHO III	LGG	40
TCGA-S9-A6TX-01	1245	0	Alive	Mutant	Methylated	WHO III	LGG	46
TCGA-S9-A6TY-01	1076	0	Alive	Mutant	Methylated	WHO II	LGG	50
TCGA-S9-A6TZ-01	1120	0	Alive	Mutant	Methylated	WHO II	LGG	39
TCGA-S9-A6U0-01	742	1	Dead	Wildtype	Methylated	WHO III	LGG	46
TCGA-S9-A6U1-01	785	0	Alive	Mutant	Methylated	WHO III	LGG	22
TCGA-S9-A6U2-01	908	0	Alive	Mutant	Methylated	WHO II	LGG	48
TCGA-S9-A6U5-01	992	0	Alive	Mutant	Methylated	WHO II	LGG	33
TCGA-S9-A6U6-01	1069	0	Alive	Mutant	Methylated	WHO III	LGG	28
TCGA-S9-A6U8-01	2988	1	Dead	Mutant	Methylated	WHO II	LGG	24
TCGA-S9-A6U9-01	2918	0	Alive	Mutant	Methylated	WHO III	LGG	36
TCGA-S9-A6UA-01	178	1	Dead	Wildtype	Methylated	WHO III	LGG	66
TCGA-S9-A6UB-01	3761	0	Alive	Mutant	Methylated	WHO II	LGG	52
TCGA-S9-A6WD-01	2289	0	Alive	Mutant	Methylated	WHO III	LGG	58
TCGA-S9-A6WE-01	4113	0	Alive	Mutant	Methylated	WHO II	LGG	34
TCGA-S9-A6WG-01	2602	0	Alive	Mutant	Methylated	WHO III	LGG	31
TCGA-S9-A6WH-01	1173	0	Alive	Mutant	Methylated	WHO II	LGG	73
TCGA-S9-A6WI-01	2585	0	Alive	Mutant	Methylated	WHO II	LGG	56
TCGA-S9-A6WL-01	946	0	Alive	Mutant	Methylated	WHO III	LGG	52
TCGA-S9-A6WM-01	604	0	Alive	Wildtype	Un-methylated	WHO III	LGG	59
TCGA-S9-A6WN-01	805	0	Alive	Mutant	Methylated	WHO III	LGG	38
TCGA-S9-A6WO-01	566	0	Alive	Mutant	Methylated	WHO II	LGG	29
TCGA-S9-A6WP-01	567	0	Alive	Mutant	Methylated	WHO III	LGG	42
TCGA-S9-A6WQ-01	428	0	Alive	Mutant	Methylated	WHO II	LGG	57
TCGA-S9-A7IQ-01	1099	0	Alive	Mutant	Methylated	WHO II	LGG	45
TCGA-S9-A7IS-01	241	1	Dead	Mutant	Methylated	WHO III	LGG	33
TCGA-S9-A7IX-01	819	1	Dead	Wildtype	Un-methylated	WHO III	LGG	57
TCGA-S9-A7IY-01	715	0	Alive	Mutant	Methylated	WHO III	LGG	39
TCGA-S9-A7IZ-01	608	0	Alive	Mutant	Methylated	WHO III	LGG	48
TCGA-S9-A7J0-01	609	0	Alive	Mutant	Methylated	WHO III	LGG	30
TCGA-S9-A7J1-01	249	0	Alive	Mutant	Methylated	WHO II	LGG	43
TCGA-S9-A7J2-01	62	0	Alive	Mutant	Methylated	WHO III	LGG	25
TCGA-S9-A7J3-01	629	0	Alive	Mutant	Methylated	WHO III	LGG	52
TCGA-S9-A7QW-01	458	0	Alive	Mutant	Methylated	WHO III	LGG	54
TCGA-S9-A7QX-01	564	0	Alive	Mutant	Methylated	WHO III	LGG	36
TCGA-S9-A7QY-01	863	0	Alive	Mutant	Methylated	WHO II	LGG	35
TCGA-S9-A7QZ-01	826	0	Alive	Mutant	Methylated	WHO II	LGG	41
TCGA-S9-A7R1-01	5166	1	Dead	Mutant	Methylated	WHO II	LGG	35
TCGA-S9-A7R2-01	316	1	Dead	Wildtype	Un-methylated	WHO III	LGG	69
TCGA-S9-A7R3-01	3013	0	Alive	Mutant	Methylated	WHO II	LGG	28
TCGA-S9-A7R4-01	914	0	Alive	Mutant	Methylated	WHO III	LGG	46
TCGA-S9-A7R7-01	3000	0	Alive	Mutant	Methylated	WHO II	LGG	27
TCGA-S9-A7R8-01	961	1	Dead	Mutant	Methylated	WHO III	LGG	44
TCGA-S9-A89V-01	569	0	Alive	Wildtype	Methylated	WHO III	LGG	70
TCGA-S9-A89Z-01	623	0	Alive	Mutant	Methylated	WHO III	LGG	40
TCGA-TM-A7C3-01	1666	1	Dead	Wildtype	Methylated	WHO III	LGG	43
TCGA-TM-A7C4-01	1470	0	Alive	Mutant	Methylated	WHO II	LGG	39
TCGA-TM-A7C5-01	1500	0	Alive	Mutant	Methylated	WHO II	LGG	30
TCGA-TM-A7CA-01	1058	0	Alive	Mutant	Methylated	WHO II	LGG	44
TCGA-TM-A7CF-01	1989	0	Alive	Mutant	Methylated	WHO II	LGG	41
TCGA-TM-A84B-01	758	1	Dead	Wildtype	Un-methylated	WHO III	LGG	40
TCGA-TM-A84C-01	492	1	Dead	Wildtype	Un-methylated	WHO II	LGG	32
TCGA-TM-A84F-01	1796	0	Alive	Mutant	Methylated	WHO III	LGG	48
TCGA-TM-A84G-01	1236	0	Alive	Mutant	Methylated	WHO III	LGG	54
TCGA-TM-A84H-01	926	0	Alive	Mutant	Methylated	WHO III	LGG	44
TCGA-TM-A84I-01	854	0	Alive	Mutant	Methylated	WHO III	LGG	30
TCGA-TM-A84J-01	735	0	Alive	Wildtype	Un-methylated	WHO III	LGG	63
TCGA-TM-A84L-01	1242	1	Dead	Mutant	Methylated	WHO II	LGG	31
TCGA-TM-A84M-01	754	0	Alive	Mutant	Methylated	WHO III	LGG	40
TCGA-TM-A84O-01	1011	1	Dead	Mutant	Methylated	WHO III	LGG	61
TCGA-TM-A84Q-01	772	0	Alive	Mutant	Methylated	WHO II	LGG	31
TCGA-TM-A84R-01	566	0	Alive	Mutant	Methylated	WHO II	LGG	46
TCGA-TM-A84S-01	454	0	Alive	Mutant	Methylated	WHO III	LGG	36
TCGA-TM-A84T-01	724	0	Alive	Mutant	Methylated	WHO II	LGG	19
TCGA-TQ-A7RF-01	650	0	Alive	Mutant	Un-methylated	WHO III	LGG	27
TCGA-TQ-A7RG-01	599	0	Alive	Mutant	Methylated	WHO II	LGG	36
TCGA-TQ-A7RH-01	486	0	Alive	Mutant	Methylated	WHO II	LGG	39
TCGA-TQ-A7RI-01	62	0	Alive	Mutant	Methylated	WHO II	LGG	37
TCGA-TQ-A7RJ-01	1229	0	Alive	Mutant	Methylated	WHO II	LGG	25
TCGA-TQ-A7RK-01	1341	0	Alive	Mutant	Methylated	WHO II	LGG	29
TCGA-TQ-A7RM-01	1116	0	Alive	Mutant	Methylated	WHO III	LGG	41
TCGA-TQ-A7RN-01	1026	0	Alive	Mutant	Methylated	WHO II	LGG	32
TCGA-TQ-A7RO-01	949	0	Alive	Mutant	Methylated	WHO II	LGG	29
TCGA-TQ-A7RP-01	914	0	Alive	Wildtype	Methylated	WHO II	LGG	66
TCGA-TQ-A7RQ-01	795	0	Alive	Mutant	Methylated	WHO II	LGG	38
TCGA-TQ-A7RR-01	787	0	Alive	Mutant	Un-methylated	WHO II	LGG	38
TCGA-TQ-A7RS-01		0	Alive	Mutant	Methylated	WHO II	LGG	25
TCGA-TQ-A7RU-01	1032	0	Alive	Mutant	Methylated	WHO II	LGG	51
TCGA-TQ-A7RV-01	1868	0	Alive	Mutant	Methylated	WHO II	LGG	27
TCGA-TQ-A7RW-01	821	1	Dead	Mutant	Methylated	WHO II	LGG	32
TCGA-TQ-A8XE-01	954	1	Dead	Mutant	Methylated	WHO II	LGG	42
TCGA-VM-A8C8-01	1397	0	Alive	Mutant	Un-methylated	WHO II	LGG	50
TCGA-VM-A8C9-01	1314	0	Alive	Wildtype	Un-methylated	WHO II	LGG	37
TCGA-VM-A8CA-01	411	0	Alive	Mutant	Methylated	WHO II	LGG	54
TCGA-VM-A8CB-01	3	0	Alive	Mutant	Methylated	WHO III	LGG	33
TCGA-VM-A8CD-01	240	1	Dead	Wildtype	Un-methylated	WHO III	LGG	58
TCGA-VM-A8CE-01	1191	0	Alive	Mutant	Methylated	WHO II	LGG	25
TCGA-VM-A8CF-01	609	0	Alive	Mutant	Methylated	WHO III	LGG	44
TCGA-VM-A8CH-01	714	0	Alive	Mutant	Un-methylated	WHO II	LGG	24
TCGA-VV-A829-01	1127	0	Alive	Mutant	Methylated	WHO III	LGG	44
TCGA-VV-A86M-01	487	0	Alive	Mutant	Methylated	WHO III	LGG	36
TCGA-VW-A7QS-01	706	0	Alive	Mutant	Methylated	WHO III	LGG	35
TCGA-VW-A8FI-01	245	1	Dead	Wildtype	Un-methylated	WHO III	LGG	66
TCGA-W9-A837-01	1553	0	Alive	Mutant	Methylated	WHO II	LGG	47
TCGA-WH-A86K-01	405	0	Alive	Mutant	Methylated	WHO II	LGG	65
TCGA-WY-A858-01	1337	0	Alive	Mutant	Methylated	WHO III	LGG	32
TCGA-WY-A859-01	1213	0	Alive	Mutant	Methylated	WHO II	LGG	34
TCGA-WY-A85A-01	1320	0	Alive	Mutant	Methylated	WHO II	LGG	20
TCGA-WY-A85B-01	1393	0	Alive	Mutant	Methylated	WHO II	LGG	24
TCGA-WY-A85C-01	1426	0	Alive	Mutant	Methylated	WHO II	LGG	36
TCGA-WY-A85D-01	1147	0	Alive	Mutant	Un-methylated	WHO II	LGG	60
TCGA-WY-A85E-01	633	0	Alive	Mutant	Methylated	WHO II	LGG	48
