# Supplementary material for: Integrated clustering signature of genomic heterogeneity, stemness and tumor microenvironment predicts glioma prognosis and immunotherapy response
Source: Aging (Albany NY). 2023 Sep 11;15(17):9086–104. doi: 10.18632/aging.205018 (PMC10522363; doi:10.18632/aging.205018)
Supplement: Supplementary Table 2 [file aging-15-205018-s003.xlsx]

## Sheet: CGGA.mRNAseq_310_clinical
Supplementary Table 2. Clinical information for the CGGA glioma dataset.
CGGA_ID	PRS_type	Histology	Grade	Grade	Gender	Age	OS	Censor (alive=0; dead=1)	Radio_status (treated=1;un-treated=0)	Chemo_status (TMZ treated=1;un-treated=0)	IDH_mutation_status	1p19q_codeletion_status	MGMTp_methylation_status
CGGA_261	Primary	A	WHO II	LGG	Male	27	4130	0	1	0	Mutant	Non-codel	un-methylated
CGGA_267	Primary	A	WHO II	LGG	Male	36	1374	1	0	0	Mutant	Non-codel	un-methylated
CGGA_543	Primary	O	WHO II	LGG	Male	43	4371	0	1	0	Mutant	Codel	methylated
CGGA_580	Primary	A	WHO II	LGG	Male	43	1394	1	1	0	Mutant	Non-codel	methylated
CGGA_666	Primary	O	WHO II	LGG	Female	45	2499	1	1	0	Mutant	Codel	methylated
CGGA_1004	Primary	A	WHO II	LGG	Female	63	899	1	1	0	Wildtype	Non-codel	methylated
CGGA_1005	Primary	A	WHO II	LGG	Female	41	3815	0	0	1	Mutant	Non-codel	methylated
CGGA_1059	Recurrent	rA	WHO II	LGG	Female	54	21	1	1	0	Mutant	Non-codel	un-methylated
CGGA_235	Primary	O	WHO II	LGG	Male	24	2340	1	1	1	Mutant	Codel	methylated
CGGA_485	Primary	O	WHO II	LGG	Male	31	2437	0	1	1	Mutant	Codel	un-methylated
CGGA_607	Primary	A	WHO II	LGG	Male	25	1389	0	1	0	Mutant	Non-codel	un-methylated
CGGA_642	Primary	A	WHO II	LGG	Male	29	4249	0	1	0	Mutant	Non-codel	un-methylated
CGGA_662	Primary	O	WHO II	LGG	Female	59	284	1	0	0	Mutant	Codel	un-methylated
CGGA_685	Primary	A	WHO II	LGG	Female	20	3239	1	1	1	Mutant	Non-codel	methylated
CGGA_694	Recurrent	rA	WHO II	LGG	Male	34	1194	1	0	0	Mutant	Non-codel	un-methylated
CGGA_838	Primary	O	WHO II	LGG	Female	36	4011	0	1	1	Mutant	Codel	un-methylated
CGGA_905	Primary	A	WHO II	LGG	Male	46	3174	1	1	0	Mutant	Non-codel	NA
CGGA_908	Primary	A	WHO II	LGG	Male	35	2436	1	1	NA	Mutant	Non-codel	methylated
CGGA_446	Primary	O	WHO II	LGG	Female	35	4508	0	1	0	Mutant	Codel	un-methylated
CGGA_638	Primary	O	WHO II	LGG	Male	42	2386	0	1	0	Mutant	Codel	un-methylated
CGGA_725	Primary	O	WHO II	LGG	Male	58	4147	0	1	0	Mutant	Codel	un-methylated
CGGA_785	Primary	O	WHO II	LGG	Male	43	3517	1	1	0	Mutant	Codel	methylated
CGGA_807	Primary	A	WHO II	LGG	Male	42	4040	0	1	1	Wildtype	Non-codel	NA
CGGA_904	Primary	A	WHO II	LGG	Male	33	774	1	1	0	Mutant	Non-codel	methylated
CGGA_715	Primary	O	WHO II	LGG	Male	43	3429	0	1	0	Mutant	Codel	methylated
CGGA_283	Primary	O	WHO II	LGG	Female	47	3470	1	1	1	Mutant	Codel	methylated
CGGA_893	Primary	A	WHO II	LGG	Female	36	3160	1	1	0	Mutant	Non-codel	methylated
CGGA_812	Primary	O	WHO II	LGG	Male	27	4035	0	1	0	Mutant	Codel	NA
CGGA_493	Primary	A	WHO II	LGG	Female	32	2382	1	1	1	Mutant	Non-codel	un-methylated
CGGA_655	Primary	O	WHO II	LGG	Male	35	4231	0	1	0	Mutant	Codel	un-methylated
CGGA_479	Primary	O	WHO II	LGG	Female	36	4445	0	1	0	Mutant	Codel	un-methylated
CGGA_892	Primary	O	WHO II	LGG	Male	34	448	0	1	NA	Mutant	Codel	methylated
CGGA_1013	Primary	A	WHO II	LGG	Female	38	1725	1	1	0	Mutant	Non-codel	methylated
CGGA_251	Primary	A	WHO II	LGG	Male	45	1299	0	1	0	Mutant	Non-codel	methylated
CGGA_254	Primary	O	WHO II	LGG	Male	38	4793	0	1	1	Mutant	Codel	methylated
CGGA_551	Primary	O	WHO II	LGG	Male	44	4363	0	1	0	Mutant	Codel	un-methylated
CGGA_632	Primary	A	WHO II	LGG	Female	29	576	1	1	1	Mutant	Non-codel	un-methylated
CGGA_1330	Primary	A	WHO II	LGG	Male	47	2846	0	1	1	Mutant	Non-codel	methylated
CGGA_241	Primary	A	WHO II	LGG	Male	34	4809	0	1	0	Mutant	Non-codel	methylated
CGGA_256	Primary	A	WHO II	LGG	Male	39	158	0	1	1	Mutant	Non-codel	un-methylated
CGGA_698	Primary	A	WHO II	LGG	Female	61	1851	1	1	1	Mutant	Non-codel	un-methylated
CGGA_501	Primary	O	WHO II	LGG	Male	40	4427	0	1	0	Mutant	Codel	methylated
CGGA_835	Primary	O	WHO II	LGG	Male	31	517	0	1	NA	Mutant	Codel	methylated
CGGA_D29	Primary	O	WHO II	LGG	Male	36	3643	0	1	0	Mutant	Codel	methylated
CGGA_760	Primary	O	WHO II	LGG	Female	34	4110	0	1	0	Mutant	Codel	methylated
CGGA_766	Primary	O	WHO II	LGG	Male	32	4103	0	1	0	Mutant	Codel	methylated
CGGA_1406	Primary	A	WHO II	LGG	Male	34	2154	1	1	1	Mutant	Non-codel	methylated
CGGA_659	Primary	O	WHO II	LGG	Female	50	730	0	1	1	Wildtype	Non-codel	un-methylated
CGGA_D04	Primary	A	WHO II	LGG	Male	37	3697	0	1	1	Mutant	Non-codel	methylated
CGGA_J030	Primary	O	WHO II	LGG	Male	38	3389	0	1	0	Mutant	Codel	NA
CGGA_1046	Primary	A	WHO II	LGG	Male	21	3559	0	NA	1	NA	NA	methylated
CGGA_762	Primary	O	WHO II	LGG	Female	40	4105	0	1	0	Mutant	Codel	un-methylated
CGGA_J130	Recurrent	rA	WHO II	LGG	Male	40	3116	0	1	1	Wildtype	Non-codel	NA
CGGA_1031	Primary	A	WHO II	LGG	Female	31	2457	1	0	1	Mutant	Non-codel	un-methylated
CGGA_252	Primary	A	WHO II	LGG	Female	24	165	0	1	0	Mutant	Non-codel	un-methylated
CGGA_458	Recurrent	rA	WHO II	LGG	Male	51	419	1	1	1	Mutant	Non-codel	methylated
CGGA_635	Primary	O	WHO II	LGG	Male	45	4263	0	1	1	Mutant	Codel	un-methylated
CGGA_671	Primary	O	WHO II	LGG	Female	36	4215	0	1	0	Mutant	Codel	un-methylated
CGGA_502	Primary	A	WHO II	LGG	Male	39	4414	0	1	0	Mutant	Non-codel	methylated
CGGA_898	Primary	A	WHO II	LGG	Male	38	1663	1	1	NA	Mutant	Non-codel	un-methylated
CGGA_D15	Primary	O	WHO II	LGG	Female	38	3669	0	1	1	Mutant	Codel	methylated
CGGA_1020	Primary	A	WHO II	LGG	Female	38	1120	1	1	0	Mutant	Non-codel	un-methylated
CGGA_243	Primary	O	WHO II	LGG	Female	30	2977	0	1	0	Mutant	Codel	methylated
CGGA_858	Primary	O	WHO II	LGG	Male	42	3984	0	1	0	Mutant	Codel	un-methylated
CGGA_864	Primary	O	WHO II	LGG	Male	34	3977	0	0	0	Mutant	Codel	NA
CGGA_273	Primary	A	WHO II	LGG	Female	35	2635	1	1	0	Mutant	Non-codel	un-methylated
CGGA_D47	Primary	O	WHO II	LGG	Male	36	1048	1	1	1	Mutant	Codel	methylated
CGGA_752	Primary	O	WHO II	LGG	Male	39	3680	0	1	0	Mutant	Codel	methylated
CGGA_884	Primary	A	WHO II	LGG	Female	48	1131	1	1	1	Mutant	Non-codel	methylated
CGGA_856	Primary	O	WHO II	LGG	Male	53	1297	0	1	NA	Mutant	Codel	methylated
CGGA_675	Primary	O	WHO II	LGG	Female	23	4210	0	1	1	Mutant	Codel	un-methylated
CGGA_D20	Primary	A	WHO II	LGG	Female	40	2367	1	0	0	Mutant	Non-codel	un-methylated
CGGA_269	Primary	A	WHO II	LGG	Female	45	2932	0	1	0	Wildtype	Non-codel	un-methylated
CGGA_757	Primary	A	WHO II	LGG	Male	45	1047	1	1	1	Mutant	Non-codel	un-methylated
CGGA_236	Primary	O	WHO II	LGG	Male	47	706	0	1	1	Mutant	Codel	methylated
CGGA_300	Primary	A	WHO II	LGG	Female	35	2199	1	1	1	Mutant	Non-codel	un-methylated
CGGA_541	Primary	A	WHO II	LGG	Female	36	4376	0	1	0	Wildtype	Non-codel	un-methylated
CGGA_815	Primary	A	WHO II	LGG	Female	53	2219	1	1	0	Mutant	Non-codel	un-methylated
CGGA_843	Primary	O	WHO II	LGG	Male	29	4005	0	1	1	Mutant	Codel	NA
CGGA_J024	Recurrent	rA	WHO II	LGG	Female	29	3410	0	0	0	Mutant	Non-codel	NA
CGGA_601	Primary	A	WHO II	LGG	Male	36	1133	1	1	0	Mutant	Non-codel	un-methylated
CGGA_276	Primary	O	WHO II	LGG	Male	44	529	0	0	0	Mutant	Non-codel	methylated
CGGA_689	Primary	O	WHO II	LGG	Female	36	4194	0	1	0	Mutant	Codel	methylated
CGGA_D40	Recurrent	rA	WHO II	LGG	Male	44	3557	0	0	1	Mutant	Non-codel	methylated
CGGA_D07	Primary	O	WHO II	LGG	Male	36	3691	0	1	0	Mutant	Codel	NA
CGGA_323	Primary	O	WHO II	LGG	Female	48	4338	0	0	0	Wildtype	Non-codel	un-methylated
CGGA_J042	Recurrent	rA	WHO II	LGG	Male	38	1409	1	0	0	Mutant	Non-codel	NA
CGGA_909	Primary	A	WHO II	LGG	Female	39	3920	0	1	0	Mutant	Non-codel	methylated
CGGA_333	Primary	A	WHO II	LGG	Male	40	1783	0	1	0	Mutant	Non-codel	un-methylated
CGGA_871	Primary	O	WHO II	LGG	Male	37	3964	0	1	0	Mutant	Codel	methylated
CGGA_704	Primary	A	WHO II	LGG	Male	36	2572	1	1	0	Mutant	Non-codel	methylated
CGGA_738	Primary	A	WHO II	LGG	Male	43	4132	0	1	1	Mutant	Non-codel	un-methylated
CGGA_633	Primary	O	WHO II	LGG	Female	56	1812	1	1	1	Wildtype	Non-codel	un-methylated
CGGA_818	Primary	A	WHO II	LGG	Male	46	4027	0	1	0	Mutant	Non-codel	NA
CGGA_834	Primary	A	WHO II	LGG	Male	24	4013	0	1	0	Wildtype	Non-codel	methylated
CGGA_1071	Primary	A	WHO II	LGG	Male	42	3252	1	0	1	Wildtype	Non-codel	un-methylated
CGGA_1022	Recurrent	rA	WHO II	LGG	Female	62	518	0	0	1	Wildtype	Non-codel	un-methylated
CGGA_796	Primary	A	WHO II	LGG	Male	60	559	0	1	1	Wildtype	Non-codel	un-methylated
CGGA_1322	Primary	AA	WHO III	LGG	Male	10	253	1	1	1	Mutant	Non-codel	methylated
CGGA_1388	Recurrent	rAA	WHO III	LGG	Male	37	485	1	1	1	Mutant	Non-codel	methylated
CGGA_510	Primary	AO	WHO III	LGG	Male	42	4403	0	1	1	Mutant	Codel	methylated
CGGA_641	Primary	AO	WHO III	LGG	Female	51	3411	1	1	1	Mutant	Codel	un-methylated
CGGA_D48	Recurrent	rAA	WHO III	LGG	Female	23	221	1	1	1	Mutant	Non-codel	methylated
CGGA_1281	Primary	AA	WHO III	LGG	Male	45	2909	0	1	1	Wildtype	Codel	methylated
CGGA_490	Primary	AO	WHO III	LGG	Female	37	3804	0	1	1	Mutant	Codel	methylated
CGGA_1081	Recurrent	rAA	WHO III	LGG	Female	30	216	1	0	0	Wildtype	Non-codel	un-methylated
CGGA_598	Primary	AO	WHO III	LGG	Female	61	3677	1	1	1	Mutant	Codel	methylated
CGGA_1140	Recurrent	rAA	WHO III	LGG	Female	49	921	1	0	1	Wildtype	Non-codel	methylated
CGGA_1411	Recurrent	rAA	WHO III	LGG	Female	40	329	1	1	1	Wildtype	Non-codel	methylated
CGGA_603	Recurrent	rAA	WHO III	LGG	Male	32	168	0	1	1	Mutant	Non-codel	methylated
CGGA_630	Recurrent	rO	WHO III	LGG	Male	43	4300	0	1	1	Mutant	Codel	methylated
CGGA_565	Primary	AA	WHO III	LGG	Male	51	3605	0	1	0	Wildtype	Non-codel	un-methylated
CGGA_791	Primary	AA	WHO III	LGG	Male	55	252	1	1	0	Wildtype	Non-codel	un-methylated
CGGA_314	Recurrent	rO	WHO III	LGG	Male	39	2568	1	1	1	Mutant	Codel	un-methylated
CGGA_337	Primary	AA	WHO III	LGG	Female	50	1008	1	NA	NA	Mutant	Non-codel	methylated
CGGA_1329	Recurrent	rAA	WHO III	LGG	Female	43	326	1	1	1	Mutant	Non-codel	methylated
CGGA_J023	Primary	AO	WHO III	LGG	Male	36	1028	1	1	1	Mutant	Non-codel	NA
CGGA_D52	Primary	AO	WHO III	LGG	Male	46	3529	0	1	1	Mutant	Codel	un-methylated
CGGA_D58	Recurrent	rAA	WHO III	LGG	Male	24	181	1	0	0	Wildtype	Codel	un-methylated
CGGA_1118	Recurrent	rAA	WHO III	LGG	Male	31	398	1	0	0	Mutant	Non-codel	methylated
CGGA_426	Primary	AA	WHO III	LGG	Male	50	1560	1	1	1	Wildtype	Non-codel	un-methylated
CGGA_D21	Primary	AA	WHO III	LGG	Female	37	1208	1	1	0	Mutant	Non-codel	NA
CGGA_D33	Recurrent	rAA	WHO III	LGG	Male	38	116	1	0	0	Mutant	Non-codel	methylated
CGGA_1292	Primary	AA	WHO III	LGG	Male	17	2901	0	1	1	Wildtype	Non-codel	methylated
CGGA_599	Primary	AO	WHO III	LGG	Female	66	418	1	1	0	Wildtype	Non-codel	un-methylated
CGGA_1246	Primary	AO	WHO III	LGG	Male	53	2972	0	1	1	Mutant	Codel	methylated
CGGA_1061	Recurrent	rAA	WHO III	LGG	Female	43	532	1	0	1	Mutant	Non-codel	un-methylated
CGGA_591	Primary	AA	WHO III	LGG	Female	50	1654	1	1	1	Mutant	Non-codel	methylated
CGGA_1034	Primary	AA	WHO III	LGG	Male	23	753	1	1	1	Wildtype	Non-codel	un-methylated
CGGA_245	Recurrent	rAA	WHO III	LGG	Female	39	318	1	1	1	Mutant	Non-codel	NA
CGGA_247	Primary	AA	WHO III	LGG	Male	60	609	1	1	1	Mutant	Non-codel	methylated
CGGA_D27	Recurrent	rO	WHO III	LGG	Male	33	3650	0	1	1	Mutant	Codel	un-methylated
CGGA_400	Recurrent	rAA	WHO III	LGG	Female	38	1321	1	1	0	Mutant	Non-codel	methylated
CGGA_1374	Recurrent	rAA	WHO III	LGG	Male	22	141	1	1	0	Mutant	Non-codel	methylated
CGGA_D24	Primary	AA	WHO III	LGG	Female	37	837	1	1	0	Mutant	Non-codel	NA
CGGA_1027	Primary	AO	WHO III	LGG	Male	37	2688	0	1	1	Mutant	Codel	methylated
CGGA_431	Recurrent	rO	WHO III	LGG	Male	41	4515	0	1	1	Mutant	Codel	methylated
CGGA_1190	Primary	AA	WHO III	LGG	Female	45	3082	0	0	1	Mutant	Non-codel	methylated
CGGA_1113	Primary	AO	WHO III	LGG	Male	34	1265	1	0	1	Mutant	Codel	methylated
CGGA_448	Primary	AA	WHO III	LGG	Male	64	354	1	1	1	Wildtype	Non-codel	un-methylated
CGGA_1189	Primary	AO	WHO III	LGG	Female	34	3082	0	0	1	Mutant	Codel	methylated
CGGA_1094	Recurrent	rAA	WHO III	LGG	Female	40	252	1	0	1	Mutant	Non-codel	methylated
CGGA_488	Primary	AA	WHO III	LGG	Male	23	435	1	1	1	Wildtype	Non-codel	un-methylated
CGGA_D11	Primary	AA	WHO III	LGG	Female	53	827	1	1	1	Wildtype	Non-codel	methylated
CGGA_578	Primary	AA	WHO III	LGG	Female	61	362	1	1	1	Wildtype	Non-codel	methylated
CGGA_1215	Recurrent	rAA	WHO III	LGG	Male	37	29	1	1	1	Mutant	Non-codel	methylated
CGGA_1145	Recurrent	rAA	WHO III	LGG	Male	41	239	1	1	1	Wildtype	Non-codel	methylated
CGGA_D44	Primary	AA	WHO III	LGG	Female	18	313	1	1	0	Wildtype	Non-codel	NA
CGGA_643	Primary	AA	WHO III	LGG	Male	56	331	1	1	1	Wildtype	Non-codel	un-methylated
CGGA_605	Recurrent	rA	WHO III	LGG	Male	43	4300	0	0	1	Mutant	Non-codel	methylated
CGGA_1160	Primary	AA	WHO III	LGG	Female	43	426	1	NA	NA	Mutant	Non-codel	un-methylated
CGGA_277	Primary	AO	WHO III	LGG	Male	40	4739	0	1	1	Mutant	NA	methylated
CGGA_560	Primary	AA	WHO III	LGG	Male	43	4354	0	1	0	Mutant	Non-codel	methylated
CGGA_1284	Primary	AA	WHO III	LGG	Male	73	97	1	0	1	Wildtype	Non-codel	un-methylated
CGGA_1263	Primary	AA	WHO III	LGG	Male	50	772	1	1	0	Wildtype	Non-codel	un-methylated
CGGA_1146	Primary	AA	WHO III	LGG	Male	35	2498	0	1	0	Mutant	Non-codel	methylated
CGGA_727	Primary	AA	WHO III	LGG	Male	45	1023	1	1	1	Wildtype	Non-codel	methylated
CGGA_D46	Recurrent	rAA	WHO III	LGG	Female	36	300	1	0	1	Mutant	Non-codel	methylated
CGGA_1307	Primary	AA	WHO III	LGG	Female	25	965	0	1	1	Mutant	Non-codel	un-methylated
CGGA_D56	Recurrent	rAA	WHO III	LGG	Male	45	64	1	0	0	Mutant	Non-codel	methylated
CGGA_1006	Primary	AA	WHO III	LGG	Male	42	254	1	1	1	Wildtype	Non-codel	un-methylated
CGGA_D45	Recurrent	rAA	WHO III	LGG	Male	32	856	0	1	1	Mutant	Non-codel	methylated
CGGA_D16	Primary	AA	WHO III	LGG	Female	59	261	1	1	0	Wildtype	Non-codel	methylated
CGGA_1079	Primary	AA	WHO III	LGG	Male	38	471	1	NA	NA	Wildtype	Non-codel	un-methylated
CGGA_1408	Primary	AA	WHO III	LGG	Female	64	1362	1	1	1	Wildtype	Non-codel	un-methylated
CGGA_1340	Primary	AA	WHO III	LGG	Male	35	1109	1	1	1	Wildtype	Non-codel	un-methylated
CGGA_678	Recurrent	rAA	WHO III	LGG	Male	56	386	1	0	1	Wildtype	Non-codel	un-methylated
CGGA_1231	Recurrent	rAA	WHO III	LGG	Female	31	2279	1	1	1	Wildtype	Non-codel	un-methylated
CGGA_564	Primary	AA	WHO III	LGG	Male	47	679	1	1	1	Wildtype	Non-codel	methylated
CGGA_330	Primary	AA	WHO III	LGG	Male	45	1121	1	1	1	Wildtype	Non-codel	un-methylated
CGGA_616	Primary	AA	WHO III	LGG	Male	43	952	1	1	1	Wildtype	Non-codel	methylated
CGGA_1280	Primary	AA	WHO III	LGG	Male	74	447	1	1	1	Wildtype	Non-codel	un-methylated
CGGA_1116	Recurrent	rGBM	WHO IV	GBM	Female	43	248	1	1	1	Mutant	Non-codel	methylated
CGGA_1219	Primary	GBM	WHO IV	GBM	Female	57	2120	1	1	1	Mutant	Non-codel	methylated
CGGA_822	Secondary	sGBM	WHO IV	GBM	Male	46	2237	1	0	1	Mutant	Non-codel	methylated
CGGA_808	Primary	GBM	WHO IV	GBM	Male	38	1167	0	1	1	Wildtype	Non-codel	un-methylated
CGGA_1251	Primary	GBM	WHO IV	GBM	Female	42	272	1	1	1	Wildtype	Non-codel	un-methylated
CGGA_710	Primary	GBM	WHO IV	GBM	Male	41	660	1	0	1	Mutant	Non-codel	methylated
CGGA_876	Primary	GBM	WHO IV	GBM	Female	60	159	1	NA	NA	Wildtype	Non-codel	un-methylated
CGGA_899	Recurrent	rGBM	WHO IV	GBM	Male	48	231	1	0	1	Mutant	Non-codel	methylated
CGGA_1287	Primary	GBM	WHO IV	GBM	Male	29	533	1	1	1	Mutant	Non-codel	un-methylated
CGGA_518	Secondary	sGBM	WHO IV	GBM	Male	27	212	1	0	0	Mutant	NA	un-methylated
CGGA_747	Primary	GBM	WHO IV	GBM	Male	29	970	1	1	1	Mutant	Non-codel	methylated
CGGA_1129	Secondary	sGBM	WHO IV	GBM	Male	34	168	1	1	0	Mutant	Non-codel	methylated
CGGA_680	Primary	GBM	WHO IV	GBM	Male	44	2373	1	1	1	Wildtype	Non-codel	un-methylated
CGGA_700	Primary	GBM	WHO IV	GBM	Female	24	170	0	1	1	Mutant	Non-codel	methylated
CGGA_1024	Primary	GBM	WHO IV	GBM	Male	64	3074	1	1	1	Wildtype	Non-codel	methylated
CGGA_1275	Primary	GBM	WHO IV	GBM	Male	70	183	1	1	1	Wildtype	Non-codel	un-methylated
CGGA_878	Primary	GBM	WHO IV	GBM	Male	42	863	1	0	1	Wildtype	Non-codel	un-methylated
CGGA_1060	Recurrent	rGBM	WHO IV	GBM	Male	42	227	1	0	1	Mutant	Non-codel	methylated
CGGA_374	Secondary	sGBM	WHO IV	GBM	Male	37	493	1	1	1	Mutant	Non-codel	methylated
CGGA_1314	Primary	GBM	WHO IV	GBM	Female	27	172	1	0	0	Mutant	Non-codel	methylated
CGGA_1197	Secondary	sGBM	WHO IV	GBM	Male	43	942	1	1	1	Mutant	Codel	methylated
CGGA_D38	Recurrent	rGBM	WHO IV	GBM	Female	41	689	1	1	0	Mutant	Codel	methylated
CGGA_342	Primary	GBM	WHO IV	GBM	Female	49	500	1	1	1	Wildtype	NA	methylated
CGGA_669	Recurrent	rGBM	WHO IV	GBM	Female	56	607	1	0	1	Wildtype	Codel	un-methylated
CGGA_1409	Primary	GBM	WHO IV	GBM	Female	24	2727	0	0	1	Mutant	Non-codel	un-methylated
CGGA_1412	Secondary	sGBM	WHO IV	GBM	Female	48	296	1	1	1	Mutant	Codel	methylated
CGGA_1011	Primary	GBM	WHO IV	GBM	Female	46	109	1	1	0	Wildtype	Non-codel	un-methylated
CGGA_1324	Secondary	sGBM	WHO IV	GBM	Male	42	848	1	1	1	Mutant	Codel	methylated
CGGA_1394	Recurrent	rGBM	WHO IV	GBM	Male	37	139	1	1	1	Mutant	Non-codel	methylated
CGGA_1450	Secondary	sGBM	WHO IV	GBM	Male	37	957	1	1	1	Mutant	Codel	un-methylated
CGGA_759	Primary	GBM	WHO IV	GBM	Male	30	1263	1	1	0	Mutant	Non-codel	methylated
CGGA_1068	Secondary	sGBM	WHO IV	GBM	Male	29	68	1	0	0	Mutant	Non-codel	methylated
CGGA_679	Primary	GBM	WHO IV	GBM	Female	63	263	1	1	0	Wildtype	Non-codel	methylated
CGGA_802	Primary	GBM	WHO IV	GBM	Male	42	681	1	1	1	Wildtype	Non-codel	un-methylated
CGGA_491	Primary	GBM	WHO IV	GBM	Female	36	1074	1	1	1	Mutant	Non-codel	methylated
CGGA_1053	Primary	GBM	WHO IV	GBM	Female	63	370	1	1	1	Wildtype	Non-codel	un-methylated
CGGA_1271	Recurrent	rGBM	WHO IV	GBM	Male	17	523	1	1	1	Wildtype	Non-codel	methylated
CGGA_494	Primary	GBM	WHO IV	GBM	Female	58	4435	0	1	1	Wildtype	Non-codel	methylated
CGGA_1283	Secondary	sGBM	WHO IV	GBM	Male	17	20	1	1	1	Wildtype	Non-codel	un-methylated
CGGA_773	Secondary	sGBM	WHO IV	GBM	Female	51	443	1	0	0	Mutant	Non-codel	un-methylated
CGGA_1083	Primary	GBM	WHO IV	GBM	Male	59	450	1	1	1	Wildtype	Non-codel	un-methylated
CGGA_1301	Secondary	sGBM	WHO IV	GBM	Male	48	239	1	1	1	Wildtype	Non-codel	un-methylated
CGGA_761	Primary	GBM	WHO IV	GBM	Male	45	1840	1	1	0	Mutant	Non-codel	methylated
CGGA_842	Primary	GBM	WHO IV	GBM	Female	63	204	1	1	1	Wildtype	Non-codel	un-methylated
CGGA_272	Secondary	sGBM	WHO IV	GBM	Male	51	217	1	0	0	Wildtype	Non-codel	un-methylated
CGGA_D35	Primary	GBM	WHO IV	GBM	Female	68	661	1	1	0	Wildtype	Non-codel	methylated
CGGA_1375	Secondary	sGBM	WHO IV	GBM	Female	50	92	1	1	0	Mutant	Non-codel	methylated
CGGA_848	Primary	GBM	WHO IV	GBM	Female	54	239	0	1	1	Wildtype	Non-codel	un-methylated
CGGA_804	Primary	GBM	WHO IV	GBM	Female	53	614	0	1	1	Wildtype	Non-codel	methylated
CGGA_1105	Secondary	sGBM	WHO IV	GBM	Male	29	609	1	1	1	Mutant	Non-codel	methylated
CGGA_483	Primary	GBM	WHO IV	GBM	Female	59	277	1	1	1	Wildtype	Non-codel	un-methylated
CGGA_1227	Recurrent	rGBM	WHO IV	GBM	Female	46	1197	1	1	1	Wildtype	Non-codel	methylated
CGGA_1384	Primary	GBM	WHO IV	GBM	Female	39	191	1	1	1	Mutant	Non-codel	methylated
CGGA_1270	Primary	GBM	WHO IV	GBM	Female	60	188	1	1	1	Wildtype	Non-codel	un-methylated
CGGA_1218	Secondary	sGBM	WHO IV	GBM	Male	53	286	1	1	1	Wildtype	Non-codel	un-methylated
CGGA_545	Recurrent	rGBM	WHO IV	GBM	Female	38	555	1	0	1	Mutant	Non-codel	methylated
CGGA_1177	Recurrent	rGBM	WHO IV	GBM	Male	40	449	1	1	1	Wildtype	Non-codel	un-methylated
CGGA_1475	Secondary	sGBM	WHO IV	GBM	Male	38	182	1	1	0	Mutant	Non-codel	methylated
CGGA_1099	Secondary	sGBM	WHO IV	GBM	Male	8	122	1	0	1	Wildtype	Non-codel	un-methylated
CGGA_1078	Recurrent	rGBM	WHO IV	GBM	Female	61	315	1	1	1	Wildtype	Non-codel	methylated
CGGA_D57	Primary	GBM	WHO IV	GBM	Male	40	766	1	1	1	Wildtype	Non-codel	NA
CGGA_1343	Recurrent	rGBM	WHO IV	GBM	Male	34	94	1	1	1	Wildtype	Non-codel	methylated
CGGA_1224	Primary	GBM	WHO IV	GBM	Male	57	271	1	1	1	Wildtype	Non-codel	un-methylated
CGGA_676	Primary	GBM	WHO IV	GBM	Male	60	376	1	1	1	Wildtype	Non-codel	un-methylated
CGGA_1240	Primary	GBM	WHO IV	GBM	Male	33	19	1	0	0	Wildtype	Non-codel	un-methylated
CGGA_1072	Primary	GBM	WHO IV	GBM	Male	26	1090	1	1	1	Wildtype	Non-codel	un-methylated
CGGA_D34	Secondary	sGBM	WHO IV	GBM	Male	45	147	1	0	1	Mutant	Non-codel	methylated
CGGA_1007	Primary	GBM	WHO IV	GBM	Female	57	345	1	1	1	Wildtype	Non-codel	un-methylated
CGGA_274	Primary	GBM	WHO IV	GBM	Female	55	610	0	1	1	Wildtype	Non-codel	un-methylated
CGGA_850	Primary	GBM	WHO IV	GBM	Female	52	564	0	0	0	Wildtype	Non-codel	un-methylated
CGGA_D30	Primary	GBM	WHO IV	GBM	Male	70	215	1	1	0	Wildtype	Non-codel	NA
CGGA_1188	Secondary	sGBM	WHO IV	GBM	Female	30	256	1	1	1	Mutant	Non-codel	un-methylated
CGGA_789	Primary	GBM	WHO IV	GBM	Male	50	345	1	1	0	Wildtype	Non-codel	un-methylated
CGGA_D03	Primary	GBM	WHO IV	GBM	Male	44	423	1	1	1	Wildtype	Non-codel	methylated
CGGA_1234	Primary	GBM	WHO IV	GBM	Male	32	705	1	1	1	Wildtype	Non-codel	un-methylated
CGGA_1216	Primary	GBM	WHO IV	GBM	Male	44	312	1	1	1	Wildtype	Non-codel	methylated
CGGA_D36	Recurrent	rGBM	WHO IV	GBM	Male	58	34	1	0	0	Wildtype	Non-codel	methylated
CGGA_D09	Primary	GBM	WHO IV	GBM	Male	57	233	1	1	0	Wildtype	Non-codel	un-methylated
CGGA_1136	Secondary	sGBM	WHO IV	GBM	Female	38	236	1	0	1	Mutant	Non-codel	methylated
CGGA_D51	Recurrent	rGBM	WHO IV	GBM	Female	60	135	1	0	0	Wildtype	Non-codel	un-methylated
CGGA_1346	Secondary	sGBM	WHO IV	GBM	Female	57	284	1	1	1	Wildtype	Non-codel	un-methylated
CGGA_658	Primary	GBM	WHO IV	GBM	Male	55	372	1	1	1	Wildtype	Non-codel	methylated
CGGA_D32	Recurrent	rGBM	WHO IV	GBM	Male	61	358	1	0	1	Wildtype	Non-codel	un-methylated
CGGA_1039	Primary	GBM	WHO IV	GBM	Male	40	727	1	0	1	Wildtype	Non-codel	methylated
CGGA_719	Secondary	sGBM	WHO IV	GBM	Male	51	101	1	1	1	Mutant	NA	un-methylated
CGGA_902	Primary	GBM	WHO IV	GBM	Male	54	193	1	NA	NA	Wildtype	Non-codel	un-methylated
CGGA_1074	Primary	GBM	WHO IV	GBM	Male	50	86	1	1	1	Wildtype	Non-codel	methylated
CGGA_1175	Secondary	sGBM	WHO IV	GBM	Female	36	441	1	0	1	Mutant	Non-codel	methylated
CGGA_1460	Secondary	sGBM	WHO IV	GBM	Male	51	209	1	1	1	Wildtype	Non-codel	methylated
CGGA_1170	Secondary	sGBM	WHO IV	GBM	Male	25	346	1	1	1	Mutant	Non-codel	methylated
CGGA_782	Primary	GBM	WHO IV	GBM	Male	60	289	1	1	0	Wildtype	Non-codel	un-methylated
CGGA_1001	Primary	GBM	WHO IV	GBM	Male	11	3817	0	0	1	Wildtype	Non-codel	un-methylated
CGGA_D37	Primary	GBM	WHO IV	GBM	Male	55	965	1	1	1	Wildtype	Non-codel	un-methylated
CGGA_1091	Primary	GBM	WHO IV	GBM	Female	51	1116	1	1	1	Wildtype	Non-codel	methylated
CGGA_1370	Recurrent	rGBM	WHO IV	GBM	Male	43	325	0	1	1	Wildtype	Non-codel	un-methylated
CGGA_1381	Recurrent	rGBM	WHO IV	GBM	Female	36	46	1	1	1	Mutant	Non-codel	methylated
CGGA_1119	Recurrent	rGBM	WHO IV	GBM	Male	52	422	1	0	1	Mutant	Codel	methylated
CGGA_525	Primary	GBM	WHO IV	GBM	Male	61	138	1	1	0	Wildtype	Non-codel	methylated
CGGA_1237	Primary	GBM	WHO IV	GBM	Male	62	296	1	1	1	Wildtype	Non-codel	un-methylated
CGGA_1070	Primary	GBM	WHO IV	GBM	Male	37	333	1	1	1	Wildtype	Non-codel	un-methylated
CGGA_499	Primary	GBM	WHO IV	GBM	Male	51	122	1	1	0	Wildtype	Non-codel	methylated
CGGA_1114	Primary	GBM	WHO IV	GBM	Male	53	460	1	1	1	Wildtype	Non-codel	un-methylated
CGGA_1171	Primary	GBM	WHO IV	GBM	Male	40	412	1	1	0	Wildtype	Non-codel	methylated
CGGA_1299	Primary	GBM	WHO IV	GBM	Male	54	550	1	1	1	Wildtype	Non-codel	un-methylated
CGGA_624	Recurrent	rGBM	WHO IV	GBM	Female	50	122	1	NA	NA	Wildtype	Non-codel	un-methylated
CGGA_1214	Primary	GBM	WHO IV	GBM	Female	49	604	1	1	1	Wildtype	Non-codel	methylated
CGGA_1073	Primary	GBM	WHO IV	GBM	Female	42	270	1	1	1	Wildtype	Non-codel	un-methylated
CGGA_413	Primary	GBM	WHO IV	GBM	Male	54	183	0	1	1	Wildtype	Non-codel	un-methylated
CGGA_731	Primary	GBM	WHO IV	GBM	Male	50	503	1	1	0	Wildtype	Non-codel	un-methylated
CGGA_D26	Recurrent	rGBM	WHO IV	GBM	Male	55	263	1	0	0	Wildtype	Non-codel	un-methylated
CGGA_1124	Primary	GBM	WHO IV	GBM	Male	47	484	1	1	1	Wildtype	Non-codel	un-methylated
CGGA_1019	Recurrent	rGBM	WHO IV	GBM	Male	60	212	1	0	1	Wildtype	Non-codel	methylated
CGGA_1015	Primary	GBM	WHO IV	GBM	Male	62	164	1	1	0	Wildtype	Non-codel	un-methylated
CGGA_604	Primary	GBM	WHO IV	GBM	Male	46	381	1	1	1	Wildtype	Non-codel	methylated
CGGA_318	Secondary	sGBM	WHO IV	GBM	Female	40	222	1	NA	1	Wildtype	Non-codel	un-methylated
CGGA_1313	Primary	GBM	WHO IV	GBM	Male	42	379	1	1	1	Wildtype	Non-codel	un-methylated
CGGA_1035	Primary	GBM	WHO IV	GBM	Female	60	567	1	1	0	Wildtype	Non-codel	methylated
CGGA_1008	Primary	GBM	WHO IV	GBM	Female	54	315	1	1	1	Wildtype	Non-codel	un-methylated
CGGA_1338	Primary	GBM	WHO IV	GBM	Female	61	1122	1	1	1	Wildtype	Non-codel	methylated
CGGA_1026	Primary	GBM	WHO IV	GBM	Male	57	1570	1	1	1	Wildtype	Non-codel	methylated
CGGA_1180	Primary	GBM	WHO IV	GBM	Female	48	1226	0	1	1	Wildtype	Non-codel	un-methylated
CGGA_859	Primary	GBM	WHO IV	GBM	Male	56	387	1	1	0	Wildtype	Non-codel	un-methylated
CGGA_837	Primary	GBM	WHO IV	GBM	Male	57	432	1	1	1	Wildtype	Non-codel	methylated
CGGA_1272	Secondary	sGBM	WHO IV	GBM	Male	32	124	1	1	0	Mutant	Non-codel	methylated
CGGA_1258	Primary	GBM	WHO IV	GBM	Male	42	114	1	0	0	Wildtype	Non-codel	un-methylated
CGGA_1045	Primary	GBM	WHO IV	GBM	Male	79	348	1	1	1	Wildtype	Non-codel	un-methylated
CGGA_1049	Primary	GBM	WHO IV	GBM	Male	58	809	1	1	1	Wildtype	Non-codel	un-methylated
CGGA_1393	Secondary	sGBM	WHO IV	GBM	Male	41	275	1	1	1	Wildtype	Non-codel	methylated
CGGA_1109	Primary	GBM	WHO IV	GBM	Male	42	1348	1	NA	NA	Wildtype	Non-codel	un-methylated
CGGA_1332	Primary	GBM	WHO IV	GBM	Female	55	510	0	0	1	Wildtype	Non-codel	methylated
CGGA_1023	Primary	GBM	WHO IV	GBM	Female	56	681	1	1	1	Wildtype	Non-codel	un-methylated
CGGA_1139	Primary	GBM	WHO IV	GBM	Female	53	1196	1	1	1	Wildtype	Non-codel	methylated
CGGA_D02	Recurrent	rGBM	WHO IV	GBM	Male	44	484	1	0	1	Wildtype	Non-codel	methylated
CGGA_1342	Primary	GBM	WHO IV	GBM	Male	47	186	1	1	1	Wildtype	Non-codel	un-methylated
CGGA_1077	Primary	GBM	WHO IV	GBM	Male	47	591	1	1	0	Wildtype	Non-codel	un-methylated
CGGA_1320	Primary	GBM	WHO IV	GBM	Male	19	59	1	0	1	Wildtype	Non-codel	un-methylated
CGGA_1285	Recurrent	rGBM	WHO IV	GBM	Female	58	79	1	0	0	Wildtype	Non-codel	methylated
